# Supplementary material for: The role of site accessibility in microRNA target recognition
Source: Springer Nature journal article supplement (doi:10.1038/ng2135), 2007-09-23
Supplement: 41588_2007_BFng2135_MOESM20_ESM.pdf [file 41588_2007_BFng2135_MOESM20_ESM.pdf]

**Supplementary Information for:**

**The role of site accessibility in microRNA target recognition**

Michael Kertesz<sup>1\*</sup>, Nicola Iovino<sup>2\*</sup>, Ulrich Unnerstall<sup>2</sup>, Ulrike Gaul<sup>2†</sup>, Eran Segal<sup>1†</sup>

---

<sup>1</sup> Dept. of Computer Science and Applied Mathematics, Weizmann Institute of Science, Rehovot 76100, Israel.

<sup>2</sup> Laboratory of Developmental Neurogenetics, Rockefeller University, New York, NY 10021, USA.

\* These authors contributed equally to this work.

† These authors contributed equally to this work. Correspondence should be addressed to U.G.

([gaul@mail.rockefeller.edu](mailto:gaul@mail.rockefeller.edu)) or E.S. ([eran@weizmann.ac.il](mailto:eran@weizmann.ac.il))

## **Supplementary Note: Discussion of other approaches that use secondary structure in predicting microRNA-mRNA interactions**

In the following, we provide a brief discussion of previously published papers that considered the secondary structure of the target mRNA as part of the interaction between the target and the microRNA. A detailed description of our own approach is provided in the Methods section of the paper.

### **Zhao et al., Nature 2005<sup>1</sup>, Cell 2007<sup>2</sup>**

Zhao et al. were the first to make use of secondary structure considerations in identifying microRNA targets, and applied their approach to the case of miR-1. They initially filter for perfect seed matches to the first 8 nucleotides of the microRNA (allowing for G:U wobble at the last nucleotide) and require conservation across four species (chicken, mouse, rat, and human). They then examine the mRNA structure in which the sites are embedded as follows: Adding 70 nucleotides upstream and downstream of the target site, they use mFold<sup>3</sup> to predict the minimum free energy (MFE) structure, which is then examined for unstable structure elements, such as hairpin loops, interior loops etc.; the authors define a (species-specific) threshold for the minimum size of each such element by examining the distribution of unstable elements in secondary structures obtained from arbitrary 3'UTR regions. In addition, they consider the overall stability of the entire (target +/- 70 bp) region as computed by the total folding energy  $\Delta G$ , again using randomly selected 3'UTR regions for comparison.

Although the authors showed the utility of this procedure for explaining interactions between miR-1 and its targets, the approach has several limitations. First, by considering only a single structure (the MFE structure), the method is susceptible to errors that secondary structure prediction algorithms, such as mFold, make in the pairing of individual nucleotides; this problem becomes particularly acute when specific secondary structure elements, with defined size requirements, are to be predicted. One solution to this problem is to consider larger sets of structures or the entire ensemble of possible structures. In addition, when choosing thresholds by comparing with 'random' UTR sequences, the base composition should be controlled, since G:C pairs have

higher binding energy compared to A:U pairs, which of course affects the total free energy and thus, indirectly, the MFE structure prediction. Finally, the choice of 70 bp flanking sequence for computing the overall stability of the target region is not justified or evaluated. The authors do not experimentally validate their approach or show its utility for genome-wide predictions.

#### **Robins et al., PNAS 2005<sup>4</sup>**

Independently of Zhao et al, Robins et al. have early on proposed a method for predicting microRNA-target interactions that incorporates certain features of the secondary structure of the target mRNA. The authors define microRNA target sites as those that meet three criteria: (1) 5' pairing: perfect sequence complementarity between bases 1-7, 2-8, or 3-9 of the microRNA and 7 consecutive nucleotides in the target; (2) 3' pairing: the number of A:U and G:C matches are counted (G:U wobbles are ignored), with each type of match having a potentially different weight; a threshold for this measure is defined by fitting to a list of known target sites; (3) The MFE structure of the target site is required to contain at least 3 consecutive nucleotides within the 5' seed that are unpaired.

In contrast to nearly all other microRNA-target prediction methods, this approach scores the microRNA-target duplex on the basis of counting the number of paired nucleotides, i.e., without explicitly using the binding energy of the microRNA-target duplex. Such a computation does not make use of stacking energies between adjacent bases and thus provides additional degrees of freedom in determining the relative weights of A:U and G:C matches, which are then fitted using a small set of validated *C. elegans* and *Drosophila* targets. In addition, the proposed approach integrates secondary structure by way of a specific demand for three consecutive unpaired nucleotides in the MFE structure, a requirement that is not well motivated. Moreover, as discussed above, MFE structure predictions are generally susceptible to errors in predicting the exact pairing of particular nucleotides. The authors test 19 targets predicted by their algorithm and achieve good correlation for the very top predictions, but do not perform well for targets ranking outside the top 4, which leads them to an unusually low estimate of 10 as the median number of targets per microRNA. Their

predictions thus miss many targets that have in the meantime been validated experimentally.

### **Long et al., Nature Structural Molecular Biology 2007<sup>5</sup>**

Motivated by the native paradigms in the worm (*let7:lin41*), in which tandem target sites retain *in vivo* functionality despite G:U wobbles and mismatches in the 5' seed, these authors do not enforce any constraints on the 5' pairing of the microRNA on the target, in contrast to most other prediction methods. Instead, the authors model microRNA-target interactions as a two-step process that consists of a rate-limiting nucleation step followed by an elongation step in which the microRNA-target interaction is extended to encompass the full length of the microRNA.

For the nucleation step, which extends a criterion used by Robins et al.<sup>4</sup>, the authors examine the secondary structure of the target and search for blocks of four consecutive nucleotides that have a probability of 0.5 or greater of being unpaired; they compute the binding free energy between the microRNA and each such block, and then take the best such binding energy as the nucleation potential for the considered hybridization. To overcome the limitation of MFE structure predictions, the authors perform this calculation by averaging over 1000 structures sampled from the entire Boltzmann ensemble. They then apply a threshold of  $-4.09^6$  kcal mol<sup>-1</sup> or  $-5.2^7$  kcal mol<sup>-1</sup>, for the nucleation potential; once a target site has passed this threshold, the authors determine the total interaction energy between microRNA and target site in a second step. This is done by computing the difference between the free energy of the microRNA-target duplex ( $\Delta G_{\text{hybrid}}$ ) and the free energy of disrupting the structure of the target site ( $\Delta G_{\text{disruption}}$ ).  $\Delta G_{\text{hybrid}}$  is computed as the binding free energy of the MFE structure, forcing a threshold of  $-14$  kcal mol<sup>-1</sup>.  $\Delta G_{\text{disruption}}$  is determined by computing the difference between the native mRNA structure and the same structure with the target site unpaired, again averaging over 1000 samples from the ensemble of structures. Finally, for multiple sites, the scores of the individual binding sites are summed, and another threshold is introduced for the total combined free energy ( $-10$  kcal mol<sup>-1</sup>).

Sampling and averaging over many predicted secondary structures as Long et al. do represents a clear improvement over considering only the MFE structure. However, it is unclear whether the concept of a nucleation step, which is derived from kinetic measurements of freely hybridizing RNA or DNA molecules<sup>7</sup>, is appropriate for microRNA-target interaction, since microRNAs bind as part of a large protein complex (RISC). Overall, the authors employ four different numerical thresholds that a target site must meet in order to be deemed functional. These parameters are derived from different sources and fitted to a small and biased dataset (only one microRNA-mRNA pair), which is based on a non-linear experimental readout. Finally, the authors do not provide genome-wide prediction or comparisons to other published approaches that would permit gauging their method's success.

We generated such a comparison using the web-server provided by the authors (<http://sfold.wadsworth.org/starmir.pl>). Each microRNA-target pairs tested in our own experiments and from the set of interactions we collected from the literature was scored, using the STarMir default parameter threshold values ( $\Delta G_{\text{hybrid}} = -14$  kcal/mol;  $\Delta G_{\text{initiation}} = 4.09$  kcal/mol) and the procedure described by the authors of linearly summing multiple target sites for a microRNA on the same 3'UTR to arrive at a total predicted degree of repression  $\sum \Delta G_{\text{total}}$ . We also followed the authors approach in adding the last 200bp of the coding sequence to the UTR. We found that STarMir does not perform better than expected by chance in predicting validated microRNA-target interactions in *Drosophila* (**Fig. 4a**). When applying the algorithm to our own experimental data, we find that many targets do not pass the prediction thresholds that are applied (**Supplementary Fig. 3**), and the ones that do achieve poor correlation to the measured degree of repression ( $r=0.44$ ,  $p=0.23$  for the set of target constructs from *hid*, *grim*, and *rpr*, and  $r=0.13$ ,  $p=0.62$  for the *miR-184* target constructs). Importantly, in the converse test, our own method, without any fitting of thresholds or parameters, predicts the experimental data used to validate STarMir with good success (correlation of 0.8 between our interaction energy  $\Delta\Delta G$  and the measured expression levels reported in ref<sup>5</sup>).

### **Muckstein et al., Bioinformatics 2006<sup>8</sup>**

This computational study extends the Vienna RNA package to compute the probability that a given sequence interval is unpaired. Using this extension, the authors predict binding energies of RNA-RNA interactions in a fashion that takes into account the secondary structure of the binding site. First, the partition function of the possible secondary structures of the target RNA is calculated, subject to the constraint that a certain sequence interval (the binding site) remains unpaired. Next, they compute the interaction energy between the target and interacting RNA given that the binding site of the target is unpaired. In this computation, they assume that the region of interaction between the two RNAs may contain bulge loops and mismatches. Finally, the total interaction probability at a possible binding site is obtained as the sum over all possible types of binding. The authors apply their method to published siRNA experimental data and show that it can quantitatively predict siRNA binding to the target mRNA.

Overall, the thermodynamic modeling of the binding event employed in this approach is similar to the one we describe. However, the authors do not apply their method to microRNAs, and thus their approach does not model several features of the microRNA-target interaction that we find as critical for explaining the extant experimental data for microRNAs. These important additions include the constraints on the target seed that further constrain the partition function, the combination of multiple sites into a total interaction energy score, and the option to include an additional requirement to unpair the local region flanking the binding site.

### **REFERENCES**

1. Zhao, Y., Samal, E. & Srivastava, D. Serum response factor regulates a muscle-specific microRNA that targets Hand2 during cardiogenesis. *Nature* **436**, 214-20 (2005).
2. Zhao, Y. et al. Dysregulation of Cardiogenesis, Cardiac Conduction, and Cell Cycle in Mice Lacking miRNA-1-2. *Cell* **129**, 303-317 (2007).
3. Hofacker, I. L. Vienna RNA secondary structure server. *Nucleic Acids Res* **31**, 3429-31 (2003).

4. Robins, H., Li, Y. & Padgett, R. W. Incorporating structure to predict microRNA targets. *Proc Natl Acad Sci U S A* **102**, 4006-9 (2005).
5. Long, D. et al. Potent effect of target structure on microRNA function. *Nat Struct Mol Biol* **14**, 287-94 (2007).
6. Xia, T. et al. Thermodynamic parameters for an expanded nearest-neighbor model for formation of RNA duplexes with Watson-Crick base pairs. *Biochemistry* **37**, 14719-35 (1998).
7. Hargittai, M. R., Gorelick, R. J., Rouzina, I. & Musier-Forsyth, K. Mechanistic insights into the kinetics of HIV-1 nucleocapsid protein-facilitated tRNA annealing to the primer binding site. *J Mol Biol* **337**, 951-68 (2004).
8. Muckstein, U. et al. Thermodynamics of RNA-RNA binding. *Bioinformatics* **22**, 1177-82 (2006).

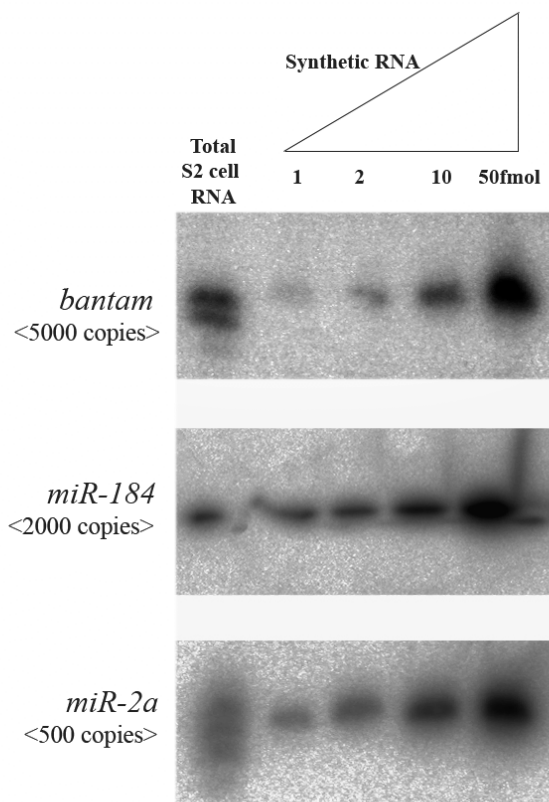

**Supplementary Figure 1. Quantitative Northern analysis of *bantam*, *miR-184***

**and *miR-2* expression in S2 cells.** 5  $\mu$ g of total RNA were extracted from 300,000 S2 cells using Trizma (Sigma-Aldrich), electrophoresed in a 10% polyacrylamide-8M urea gel and electroblotted onto Hybond-N<sup>+</sup> membrane (Amersham). To quantify the amount of microRNA within the extract, synthetic oligoribonucleotides (Sigma-Genosys) were loaded in different amounts (1,2,10,50 fmol) onto the gel for comparison. The blots were hybridized (5X SSC, 20mM Na<sub>2</sub>HPO<sub>4</sub>, 7% SDS, 1X Denhardt's, 100 $\mu$ g/ml salmon sperm DNA ; 50°C) using <sup>32</sup>P-endlabeled deoxyribonucleotides, and exposed on a phosphoimager screen using a Fuji BAS100 Bioimager for appropriate lengths of time. Copy number was determined by comparing signal intensities using *image gauge* software.



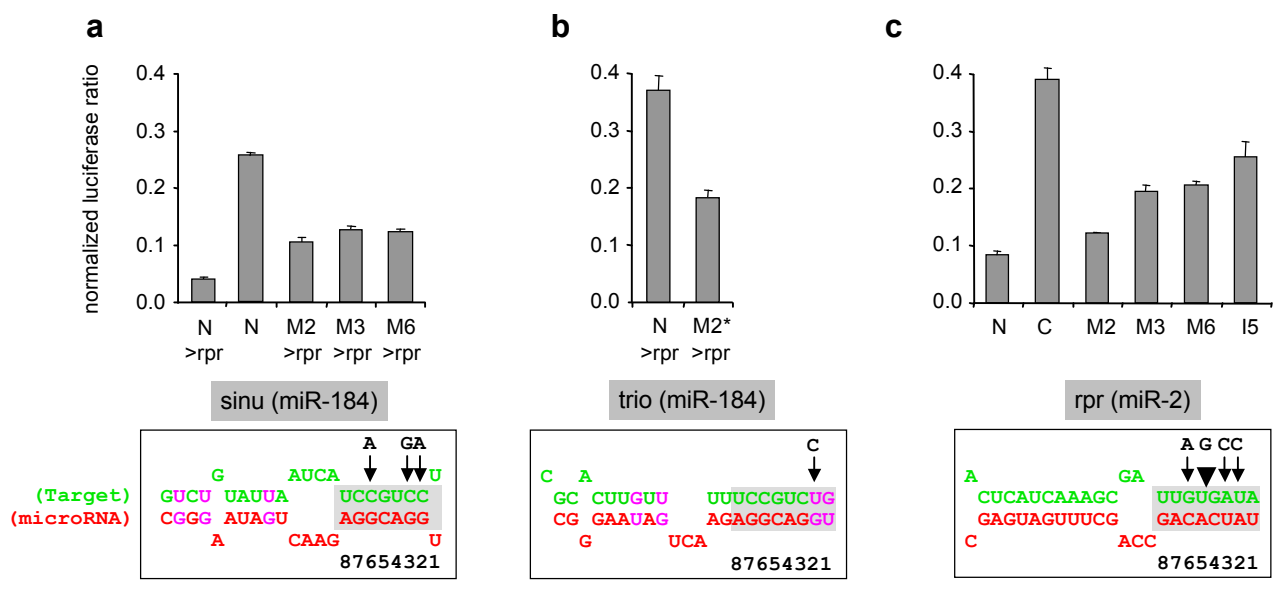

**Supplementary Figure 2. Mutational analysis of *miR-184* targets.** (a) Expression levels mediated by ~200 bp 3' UTR constructs containing different versions of the *miR-184* target site from *sinu*, embedded in the *rpr* sequence context (>*rpr*). Shown are results for the native site (*N*>*rpr*) and for constructs containing different point mutations in the 5' seed of the site (*M*>*rpr*); for comparison, the result for the native site in the *sinu* context (*N*), which has a more closed secondary structure, is also shown. The miRNA:target sequence pairing is depicted below the graph, 5' seed is highlighted in grey; G:U wobbles in pink, arrows point to the mutated bases (2, 3 and 6). Comparison with the equivalent mutations for the miR-2 target site in *rpr* in (c) shows similar scale of effects. (b) Similar to (a), but for constructs containing versions of the *miR-184* target site from *trio*, and a mutation designed to improve site complementarity (the G:U wobble at position 2 is replaced by a G:C match); the mutated site indeed shows significantly stronger repression. (c) Similar to (a), but for the *miR-2* target site from *rpr*, data repeated from Figure 1 for comparison. All results shown are average values ( $\pm$  SEM) of normalized Renilla/Firefly ratios obtained from four to eight replicates.

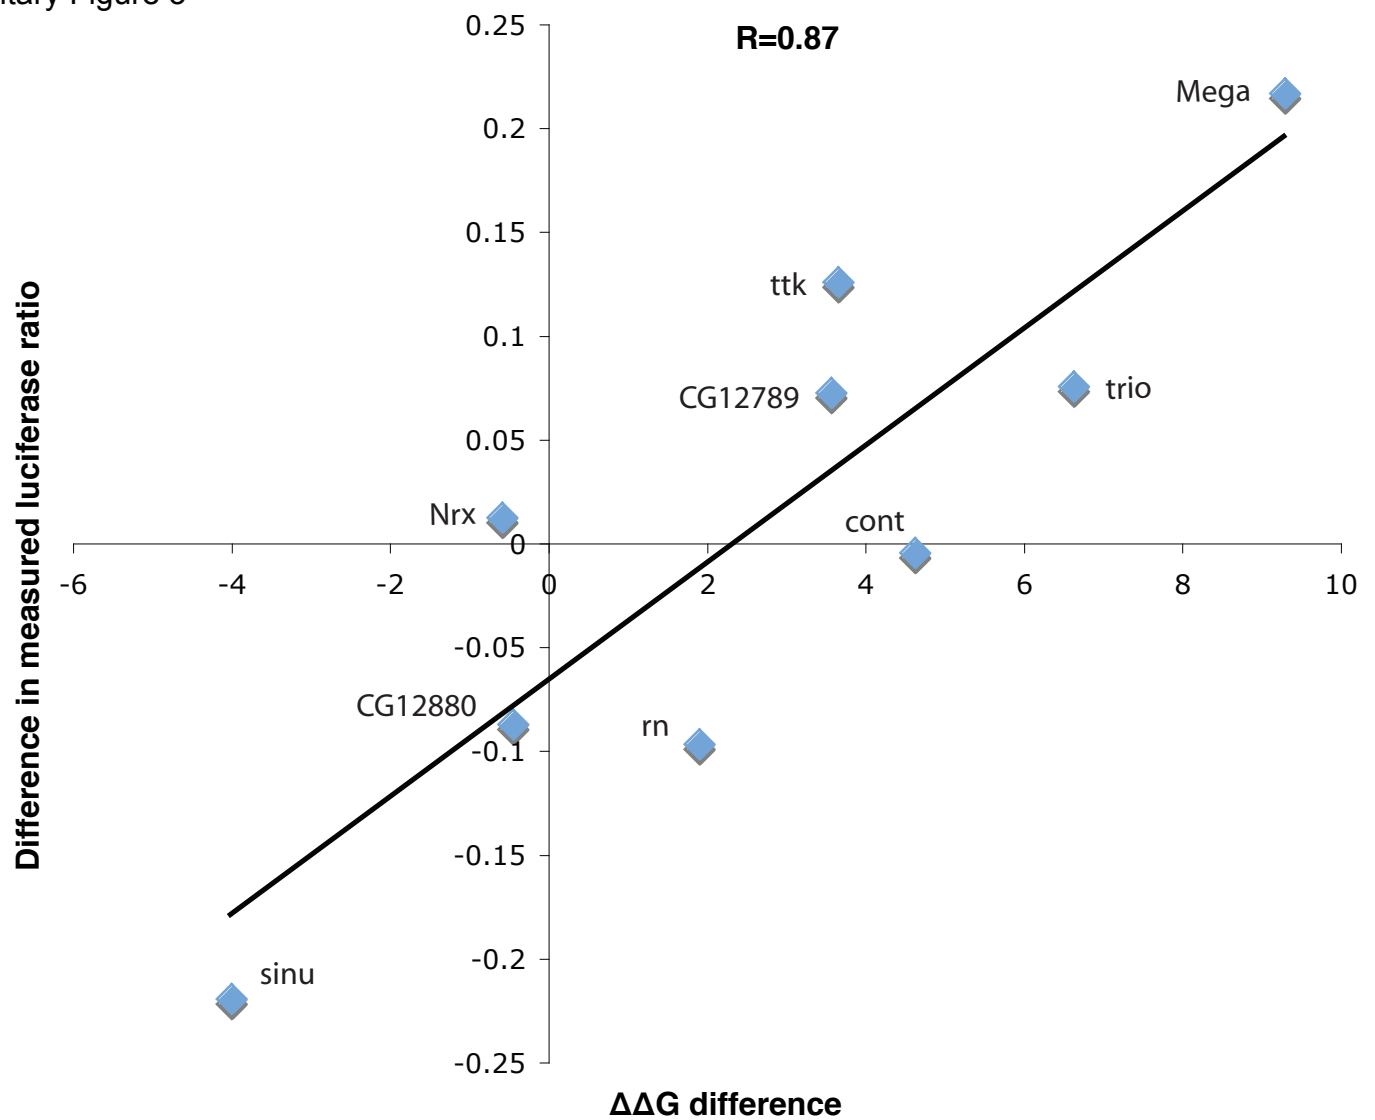

**Supplementary Figure 3. Differentials in site repression between native and *rpr* sequence context are predicted by our model.** For each of the miR-184 sites that were tested in both the native and *rpr* sequence context (**Fig. 3a**), shown is the difference between the interaction energy  $\Delta\Delta G$  predicted by the model in the *rpr* sequence context and the native context (x-axis), and the difference in the measured expression for the site between the *rpr* sequence context and the native context (y-axis). All pairs from **Fig. 3a** are shown and labeled, except for *Gli*, whose site does not pass our seed criteria. The correlation between the difference in predicted interaction energy and the difference in measured expression is shown (top).  $\Delta\Delta G$  values were calculated using the same flank settings as in **Fig. 3** (14 upstream, 15 downstream).

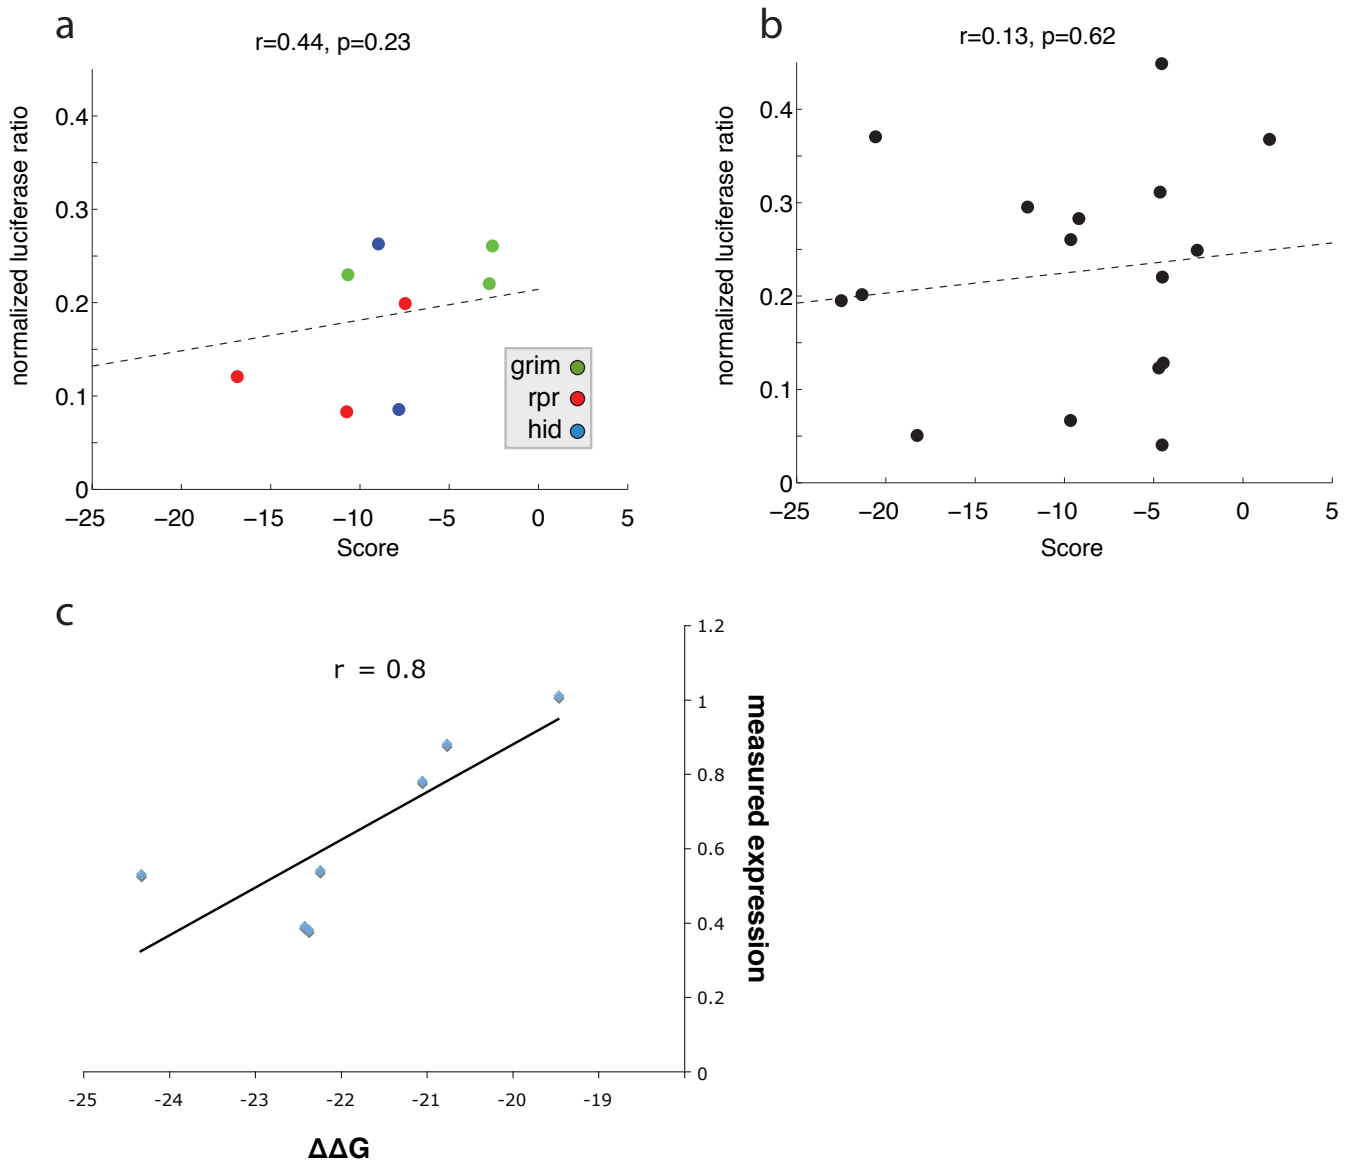

**Supplementary Figure 4. Predictive power of STarMir on our experimental data and of our method on STarMir experiments.** (a-b) Scatter plot of the score assigned by STarMir to each of our microRNA-target pairs (x-axis) and the observed expression level (y-axis). The correlation between the score given by STarMir and the actual measured expression level of each of our constructs is given along with its p-value (top) for (a) our constructs for *grim*, *hid*, and *rpr* from **Fig. 1**, and (b) our constructs for miR-184 from **Fig. 3a**. In (a), only 8 of our 22 constructs pass the threshold of prediction by STarMir, and in (b) only 16 of our 22 constructs pass the STarMir prediction threshold. (c) plot of the interaction energy assigned by our model,  $\Delta\Delta G$  (x-axis), and the reported expression level of the constructs from Long et al. (y-axis). The correlation between our score and the reported expression level is given (top). All eight constructs reported by Long et al. are shown, except for one construct (pVT712) in which we made no predictions as there are no sites that passed our minimal seed requirements.  $\Delta\Delta G$  values were calculated with no flank.

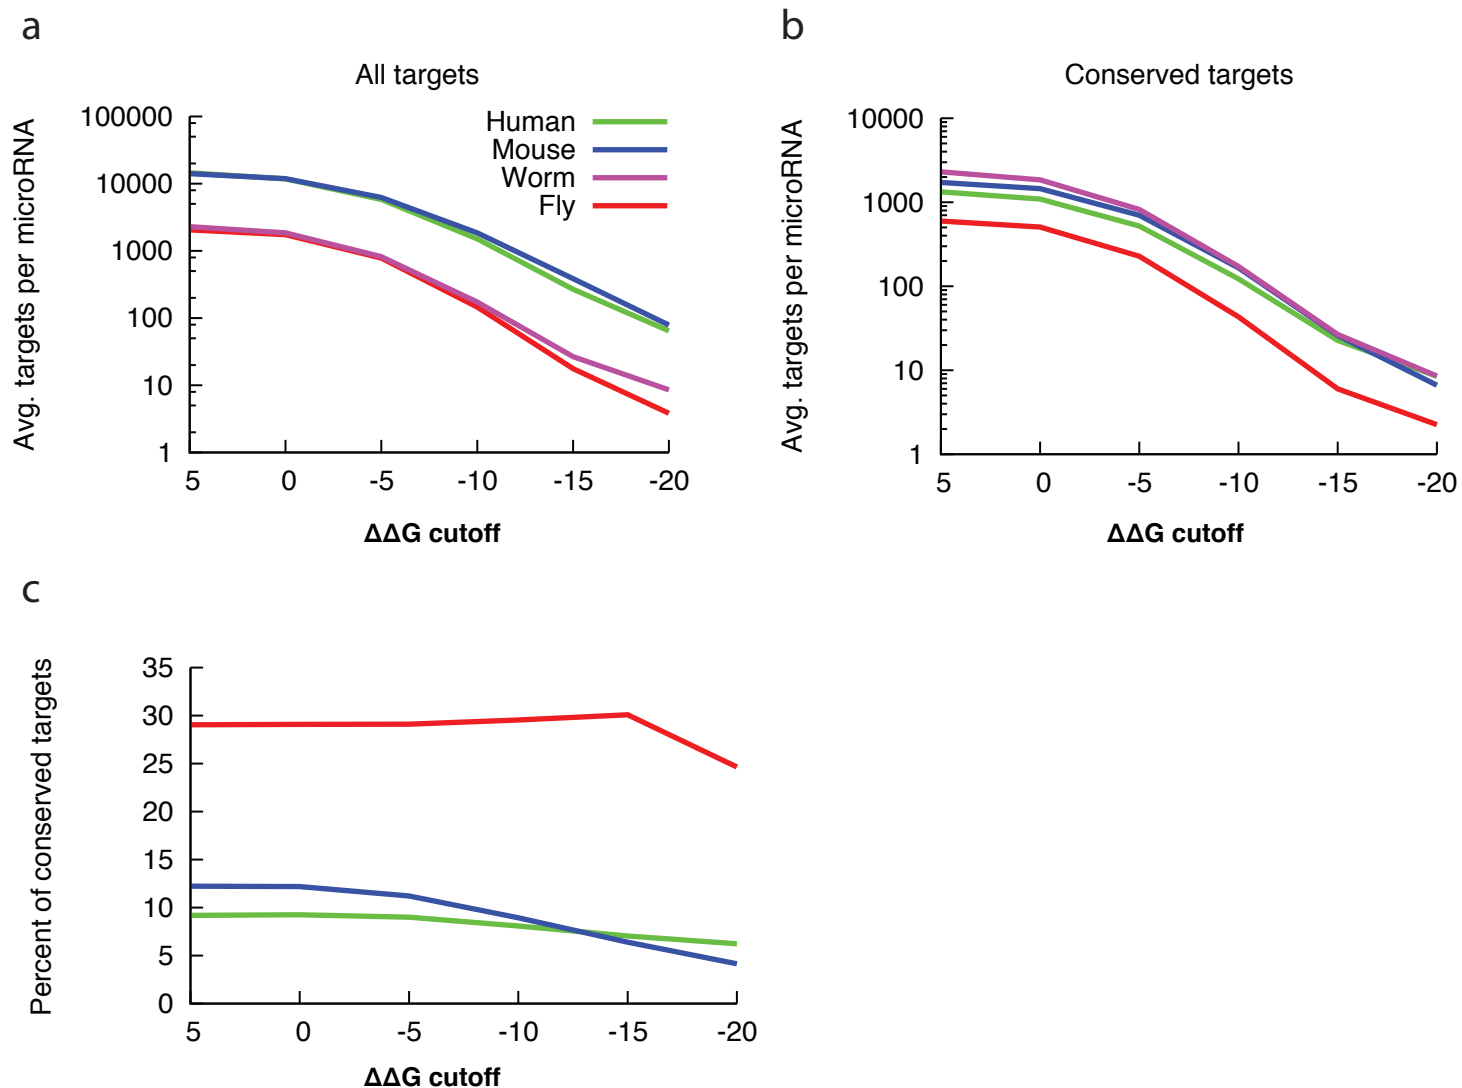

**Supplementary Figure 5. Average number of targets per microRNA.** Average number of target sites per microRNA predicted by PITA (y-axis) as a function of  $\Delta\Delta G$  cutoff (x-axis). In (a) all targets are shown, and in (b) only targets with conservation above 0.9 are shown. (c) Percentage of conserved (>0.9) targets (y-axis) as a function of the  $\Delta\Delta G$  cutoff (x-axis).

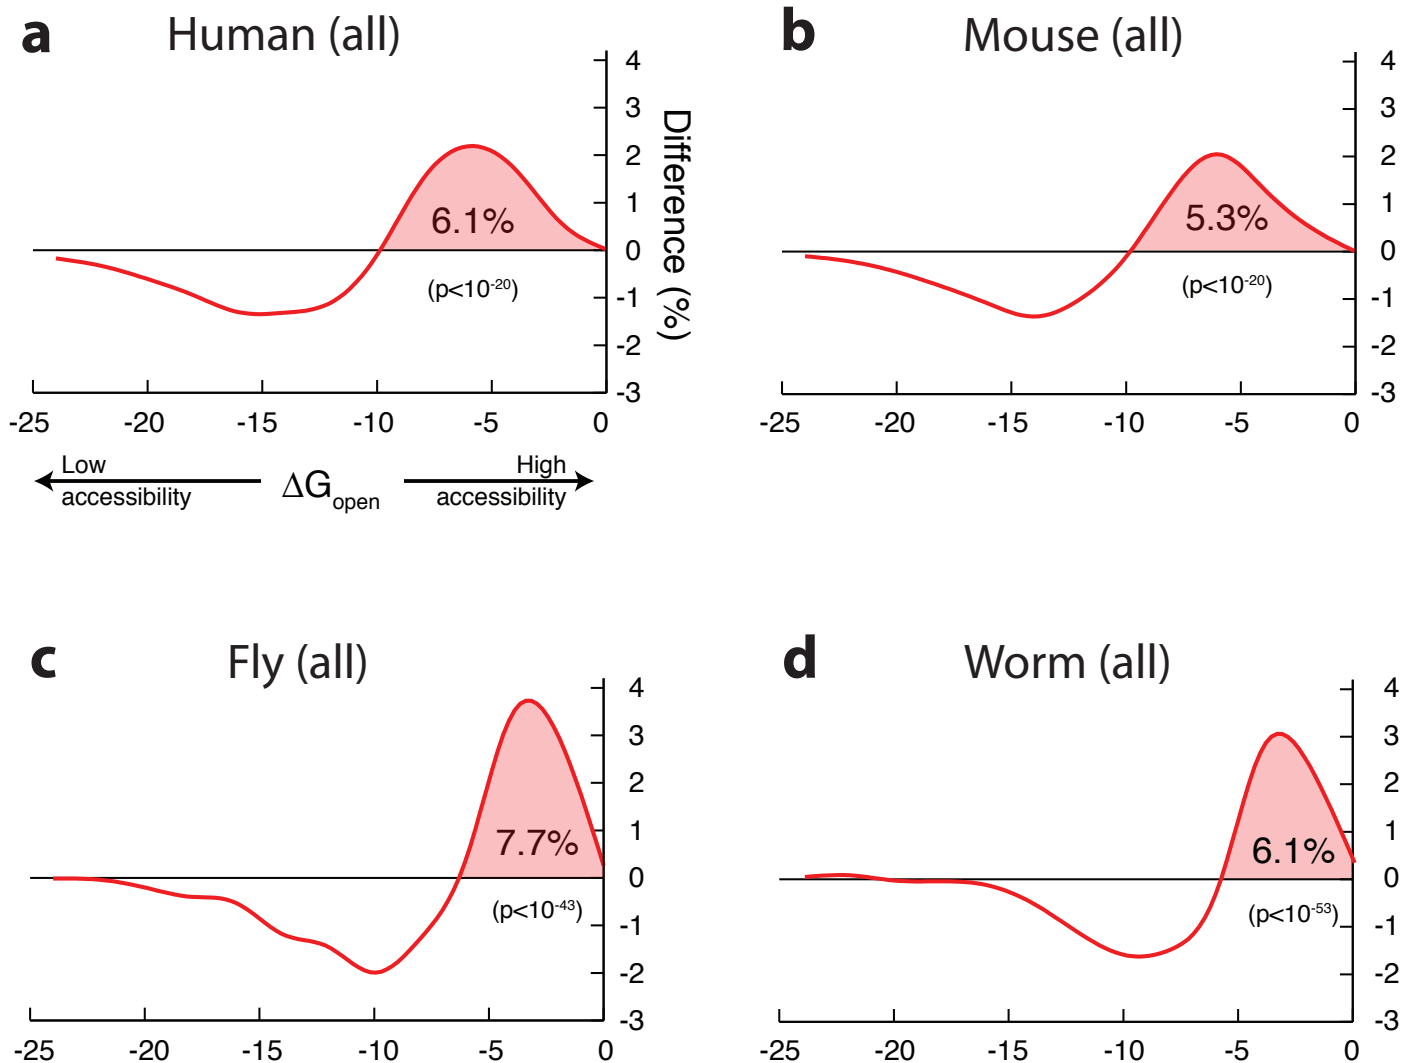

**Supplementary Figure 6. microRNA targets in animal genomes are preferentially located in regions of high accessibility.** Shown is the difference between the distribution of target accessibility scores,  $\Delta G_{\text{open}}$ , for all microRNA seeds in the 3'UTRs of human (a), mouse (b), fly (c), and worm (d), and the distribution of an equal-sized set of seeds whose locations were chosen at random from each of the respective organisms. For each accessibility value  $x$  ( $x$ -axis), we plot the difference between the fraction of real seeds and the fraction of randomly placed seeds whose accessibility is  $x$ . Since the  $\Delta G_{\text{open}}$  measure depends on the number of G and C nucleotides, random seed locations were selected such that they have the same G/C content distribution as that of the real seeds. The fraction of real seeds that are more accessible than the random seeds is indicated (shaded area), along with the significance level of the difference between the distributions, as measured by the Kolmogorov-Smirnov test.  $\Delta G_{\text{open}}$  values were calculated with no flank.

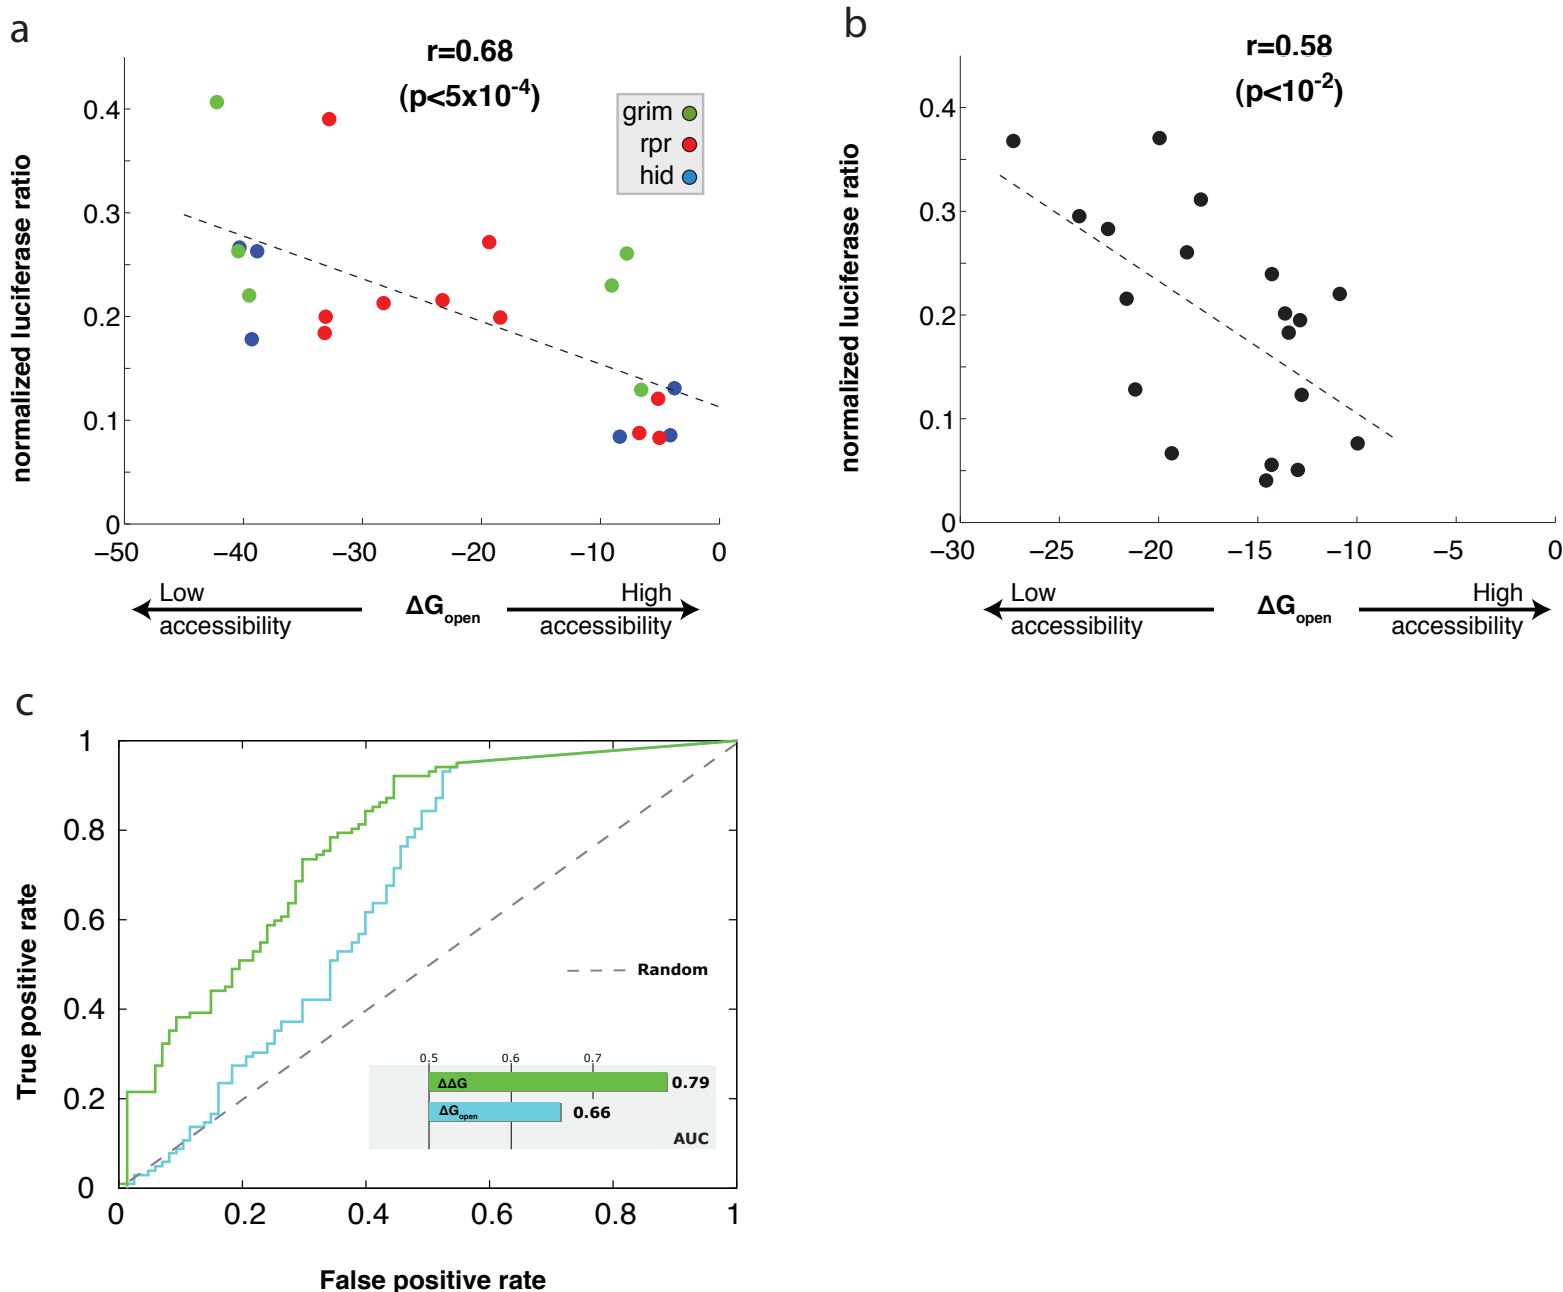

**Supplementary Figure 7. Predictive power of  $\Delta G_{\text{open}}$ .** (a) Shown is a scatter plot of the energy required to unpair the target site and make it accessible to the microRNA (x-axis),  $\Delta G_{\text{open}}$ , and the observed expression level (y-axis) of the microRNA target constructs that we measured in **Fig. 1**.  $\Delta G_{\text{open}}$  alone achieves a high correlation score (shown at the top together with its associated p-value). (b) Same as in (a), for the performance on the miR-184 target constructs. (c) Graphs showing the sensitivity and specificity of  $\Delta G_{\text{open}}$  and  $\Delta\Delta G$  on all 190 microRNA-target interaction pairs that were experimentally tested in *Drosophila* to date (**Table S3**). In each case, scores were calculated with flank, using the flank sizes specified for the respective data set in **Fig. 2, 3, and 4**.

**Supplementary Table 1: Quantification of transcript abundance of luciferase-UTR fusions.** For qPCR, RNA was extracted from S2 cells ( $5 \times 10^5$ ) 20 h after transfection using RNeasy (Quiagen); to avoid contamination with genomic DNA, samples were vortexed (1') prior to loading onto the RNeasy columns. 1 $\mu$ g of total RNA was reverse transcribed using an oligo dT primer and Superscript III (Invitrogen; 20 $\mu$ l reaction volume; 30' at 42°C; termination by heat inactivation 10' at 99°C). qPCR was carried out following the Biorad iQ SYBR Green Supermix protocol using 100 ng cDNA template and 800mM primers designed with VectorNTI software (20-22 bp; Tm 60-62°C; length of amplification product 100-200 bp). We compared the transcript levels of Renilla (FW: TGAGGAG TTCGCTGCCTACC; REV: TGCGGACAATCTGGACGACG) with Firefly (FW: ATCGTGGACCGCCTGAAGTC; REV: ACGACGGCGGCAGGCAGC) luciferase and RP49 (FW:GATGCCCAACATCGGTTACG; REV: TTGTGCACCAGG AACTTCTT) as internal control. Each data point is the result of two independent experiments done in triplicate. Relative changes in gene expression were calculated using the  $2^{-\Delta\Delta C_t}$  method, see Livak, K. J. & Schmittgen, T. D. Analysis of relative gene expression data using real-time quantitative PCR and the 2(-Delta Delta C(T)) Method. *Methods* 25, 402-8 (2001).

| Backbone       | Mean Fold changes    |
|----------------|----------------------|
| Psicheck empty | 1.00 ( 1.02 – 0.98 ) |
| RPR_N          | 0.98 ( 1.02 – 0.93)  |
| RPR_C          | 1.02 ( 1.04 – 1.00)  |
| HID_N          | 1.01 ( 1.03 - 1.00)  |
| HID_C          | 1.01 ( 1.04 – 1.00)  |
| GRIM_N         | 1.02 ( 1.04 – 1.00)  |
| GRIM_C         | 1.01 ( 1.04 – 0.98)  |
| HID_N>RPR      | 0.98 ( 1.04 – 0.93)  |
| HID_N>GRIM     | 0.97 ( 0.99 – 0.94)  |
| HID_Δ5         | 1.11 ( 1.17 – 1.05)  |

Supplementary Table 2

Set of 190 experimentally tested *Drosophila* microRNA:mRNA pairs, with references and indication of functionality (1=functional, 0=nonfunctional)

| no. | miRNA    | gene name | CG number | functional | UTR length | miRNA promoter       | UTR promoter    | Assay                        | Reference              |
|-----|----------|-----------|-----------|------------|------------|----------------------|-----------------|------------------------------|------------------------|
| 1   | let-7    | ab        | CG4807    | 1          | 1671       | actin ~ 200bp        | metallothionein | S2 in vitro (Luciferase)     | Burgler et al, 2005    |
| 2   | miR-92b  | ab        | CG4807    | 1          | 1671       | actin ~ 200bp        | metallothionein | S2 in vitro (Luciferase)     | Burgler et al, 2005    |
| 3   | miR-92b  | CrebA     | CG7450    | 1          | 1940       | actin ~ 200bp        | metallothionein | S2 in vitro (Luciferase)     | Burgler et al, 2005    |
| 4   | miR-34   | Eip74EF   | CG32180   | 1          | 1612       | actin ~ 200bp        | metallothionein | S2 in vitro (Luciferase)     | Burgler et al, 2005    |
| 5   | miR-92b  | ttk       | CG1856    | 1          | 1697       | actin ~ 200bp        | metallothionein | S2 in vitro (Luciferase)     | Burgler et al, 2005    |
| 6   | bantam   | Mad       | CG12399   | 1          | 935        | actin ~ 200bp        | metallothionein | S2 in vitro (Luciferase)     | Robins et al, 2005     |
| 7   | miR-287  | CRMP      | CG1411    | 1          | 2775       | actin ~ 200bp        | actin           | S2 in vitro (Luciferase)     | Robins et al, 2005     |
| 8   | miR-279  | SP555     | CG14041   | 1          | 758        | actin ~ 200bp        | actin           | S2 in vitro (Luciferase)     | Robins et al, 2005     |
| 9   | miR-310  | imd       | CG5576    | 1          | 381        | actin ~ 200bp        | actin           | S2 in vitro (Luciferase)     | Robins et al, 2005     |
| 10  | miR-1    | tutl      | CG15427   | 1          | 1421       | actin ~ 200bp        | actin           | S2 in vitro (Luciferase)     | Robins et al, 2005     |
| 11  | miR-34   | Su(z)12   | CG8013    | 1          | 1129       | actin ~ 200bp        | actin           | S2 in vitro (Luciferase)     | Robins et al, 2005     |
| 12  | miR-12   | rt        | CG6097    | 1          | 174        | actin ~ 200bp        | actin           | S2 in vitro (Luciferase)     | Robins et al, 2005     |
| 13  | miR-124  | Gli       | CG3903    | 1          | 1095       | actin ~ 200bp        | actin           | S2 in vitro (Luciferase)     | Robins et al, 2005     |
| 14  | miR-7    | fng       | CG10580   | 1          | 517        | actin ~ 200bp        | actin           | S2 in vitro (Luciferase)     | Robins et al, 2005     |
| 15  | miR-287  | DIP1      | CG17686   | 0          | 1259       | actin ~ 200bp        | actin           | S2 in vitro (Luciferase)     | Robins et al, 2005     |
| 16  | miR-303  | CG14991   | CG14991   | 0          | 735        | actin ~ 200bp        | actin           | S2 in vitro (Luciferase)     | Robins et al, 2005     |
| 17  | miR-278  | tup       | CG10619   | 0          | 1457       | actin ~ 200bp        | actin           | S2 in vitro (Luciferase)     | Robins et al, 2005     |
| 18  | miR-317  | yellow-c  | CG4182    | 0          | 114        | actin ~ 200bp        | actin           | S2 in vitro (Luciferase)     | Robins et al, 2005     |
| 19  | miR-318  | CG13380   | CG13380   | 0          | 570        | actin ~ 200bp        | actin           | S2 in vitro (Luciferase)     | Robins et al, 2005     |
| 20  | miR-286  | boss      | CG8285    | 0          | 150        | actin ~ 200bp        | actin           | S2 in vitro (Luciferase)     | Robins et al, 2005     |
| 21  | miR-288  | CG32057   | CG32057   | 0          | 1888       | actin ~ 200bp        | actin           | S2 in vitro (Luciferase)     | Robins et al, 2005     |
| 22  | miR-276b | kel       | CG7210    | 0          | 4284       | actin ~ 200bp        | actin           | S2 in vitro (Luciferase)     | Robins et al, 2005     |
| 23  | miR-316  | ia2       | CG31795   | 0          | 1314       | actin ~ 200bp        | actin           | S2 in vitro (Luciferase)     | Robins et al, 2005     |
| 24  | miR-7    | hairy     | CG6494    | 1          | 816        | UAS-DsRed, wing disc | tubulin         | in vivo (GFP) wing           | Stark et al, 2003      |
| 25  | miR-2b   | grim      | CG4345    | 1          | 964        | UAS-DsRed, wing disc | tubulin         | in vivo (GFP) wing           | Stark et al, 2003      |
| 26  | miR-2b   | skl       | CG13701   | 1          | 945        | UAS-DsRed, wing disc | tubulin         | in vivo (GFP) wing           | Stark et al, 2003      |
| 27  | miR-2    | rpr       | CG4319    | 1          | 485        | endogenous           | tubulin         | S2 in vitro (Luciferase)     | Stark et al, 2003      |
| 28  | bantam   | hid       | CG5123    | 1          | 2269       | p-Uast               | tubulin         | in vivo (GFP) wing           | Brennecke et al, 2003  |
| 29  | miR-7    | HLHm3     | CG8346    | 1          | 442        | UAS-DsRed, wing disc | tubulin         | in vivo (GFP or lacZ)        | Lai et al, 2005        |
| 30  | miR-7    | HLHmg     | CG8333    | 1          | 139        | UAS-DsRed, wing disc | tubulin         | in vivo (GFP or lacZ)        | Lai et al, 2005        |
| 31  | miR-7    | Brd       | CG3096    | 1          | 217        | UAS-DsRed, wing disc | tubulin         | in vivo (GFP or lacZ)        | Lai et al, 2005        |
| 32  | miR-7    | m4        | CG6099    | 1          |            | UAS-DsRed, wing disc | tubulin         | in vivo (GFP or lacZ)        | Lai et al, 2005        |
| 33  | miR-7    | Tom       | CG5185    | 1          | 414        | UAS-DsRed, wing disc | tubulin         | in vivo (GFP or lacZ)        | Lai et al, 2005        |
| 34  | miR-7    | BobA      | CG12487   | 1          | 333        | UAS-DsRed, wing disc | tubulin         | in vivo (GFP or lacZ)        | Lai et al, 2005        |
| 35  | miR-7    | HLHm5     | CG6096    | 1          | 266        | UAS-DsRed, wing disc | tubulin         | in vivo (GFP or lacZ)        | Lai et al, 2005        |
| 36  | miR-7    | Ocho      | CG3396    | 0          |            | UAS-DsRed, wing disc | tubulin         | in vivo (GFP or lacZ)        | Lai et al, 2006        |
| 37  | miR-4    | Tom       | CG5185    | 1          | 414        | UAS-DsRed, wing disc | tubulin         | in vivo (GFP or lacZ)        | Lai et al, 2005        |
| 38  | miR-4    | HLHmd     | CG8328    | 1          | 383        | UAS-DsRed, wing disc | tubulin         | in vivo (GFP or lacZ)        | Lai et al, 2005        |
| 39  | miR-4    | HLHmg     | CG8333    | 1          | 139        | UAS-DsRed, wing disc | tubulin         | in vivo (GFP or lacZ)        | Lai et al, 2005        |
| 40  | miR-4    | ma        | CG8337    | 1          |            | UAS-DsRed, wing disc | tubulin         | in vivo (GFP or lacZ)        | Lai et al, 2005        |
| 41  | miR-4    | m4        | CG6099    | 1          |            | UAS-DsRed, wing disc | tubulin         | in vivo (GFP or lacZ)        | Lai et al, 2005        |
| 42  | miR-4    | Brd       | CG3096    | 1          | 217        | UAS-DsRed, wing disc | tubulin         | in vivo (GFP or lacZ)        | Lai et al, 2005        |
| 43  | miR-4    | HLHm5     | CG6096    | 1          | 266        | UAS-DsRed, wing disc | tubulin         | in vivo (GFP or lacZ)        | Lai et al, 2005        |
| 44  | miR-2a-1 | ma        | CG8337    | 1          |            | UAS-DsRed, wing disc | tubulin         | in vivo (GFP or lacZ)        | Lai et al, 2005        |
| 45  | miR-2a-1 | HLHmd     | CG8328    | 1          | 383        | UAS-DsRed, wing disc | tubulin         | in vivo (GFP or lacZ)        | Lai et al, 2005        |
| 46  | miR-11   | m4        | CG6099    | 1          |            | UAS-DsRed, wing disc | tubulin         | in vivo (GFP or lacZ)        | Lai et al, 2005        |
| 47  | miR-11   | BobA      | CG12487   | 1          | 334        | UAS-DsRed, wing disc | tubulin         | in vivo (GFP or lacZ)        | Lai et al, 2005        |
| 48  | miR-7    | HLHmd     | CG8328    | 1          | 383        | UAS-DsRed, wing disc | tubulin         | in vivo (GFP or lacZ)        | Lai et al, 2005        |
| 49  | miR-4    | BobA      | CG12487   | 1          | 335        | UAS-DsRed, wing disc | tubulin         | in vivo (GFP or lacZ)        | Lai et al, 2005        |
| 50  | miR-4    | bap       | CG7902    | 1          | 165        | UAS-DsRed, wing disc | tubulin         | in vivo (GFP)                | Brennecke et al, 2005  |
| 51  | miR-6    | hid       | CG5123    | 1          | 2269       | endogenous           | tubulin         | in vivo (GFP and Luciferase) | Leaman et al, 2005     |
| 52  | miR-6    | grim      | CG4345    | 0          | 964        | endogenous           | tubulin         | in vivo (GFP and Luciferase) | Leaman et al, 2005     |
| 53  | miR-2    | hid       | CG5123    | 0          | 2269       | endogenous           | tubulin         | in vivo (GFP and Luciferase) | Leaman et al, 2005     |
| 54  | miR-308  | rpr       | CG4319    | 0          | 485        | endogenous           | tubulin         | in vivo (GFP and Luciferase) | Leaman et al, 2005     |
| 55  | miR-1    | Delta     | CG3619    | 1          | 2097       | UAS-Gal4             | tubulin         | in vitro (Luciferase)        | Kwon et al, 2005       |
| 56  | iab-4-5p | Ubx       | CG10388   | 1          | 2396       | UAS-DsRed            | tubulin         | in vivo (GFP or lacZ)        | Ronshaugen et al, 2005 |
| 57  | miR-7    | aop       | CG3166    | 1          | 1681       | miRNA depletion      | tubulin         | in vivo (GFP)                | Li et al, 2005         |
| 58  | miR-278  | expanded  | CG4114    | 1          | 1452       | tubulin, ~ 500bp     | tubulin         | in vitro (Luciferase)        | Teleman et al, 2006    |
| 59  | miR-9a   | sens      | CG32120   | 1          | 606        | H1 promoter, ~ 500bp | SV40            | in vitro (Luciferase)        | Li et al, 2006         |
| 60  | bantam   | -         | CG12187   | 0          | 2220       | tubulin, ~ 500bp     | tubulin         | in vivo (GFP), wing          | Stark et al, 2005      |
| 61  | bantam   | S         | CG4385    | 1          | 1161       | tubulin, ~ 500bp     | tubulin         | in vivo (GFP), wing          | Stark et al, 2005      |
| 62  | bantam   | -         | CG5919    | 0          | 365        | tubulin, ~ 500bp     | tubulin         | in vivo (GFP), wing          | Stark et al, 2005      |
| 63  | miR-1    | Tom       | CG5185    | 0          | 414        | tubulin, ~ 500bp     | tubulin         | in vitro (Luciferase)        | Stark et al, 2005      |
| 64  | miR-1    | par-6     | CG5884    | 1          | 1677       | tubulin, ~ 500bp     | tubulin         | in vitro (Luciferase)        | Stark et al, 2005      |
| 65  | miR-11   | bap       | CG7902    | 1          | 165        | tubulin, ~ 500bp     | tubulin         | in vivo (GFP), wing          | Stark et al, 2005      |
| 66  | miR-14   | -         | CG10473   | 0          | 537        | tubulin, ~ 500bp     | tubulin         | in vivo (GFP), wing          | Stark et al, 2005      |
| 67  | miR-14   | dpld      | CG1624    | 0          | 1524       | tubulin, ~ 500bp     | tubulin         | in vitro (Luciferase)        | Stark et al, 2005      |
| 68  | miR-14   | EcR       | CG1765    | 1          | 1808       | tubulin, ~ 500bp     | tubulin         | in vivo (GFP), wing          | Stark et al, 2005      |
| 69  | miR-14   | rst       | CG4125    | 0          | 1608       | tubulin, ~ 500bp     | tubulin         | in vivo (GFP), wing          | Stark et al, 2005      |
| 70  | miR-14   | wg        | CG4889    | 1          | 1069       | tubulin, ~ 500bp     | tubulin         | in vivo (GFP), wing          | Stark et al, 2005      |
| 71  | miR-14   | par-6     | CG5884    | 0          | 1677       | tubulin, ~ 500bp     | tubulin         | in vitro (Luciferase)        | Stark et al, 2005      |
| 72  | miR-14   | Eip75B    | CG8127    | 0          | 1678       | tubulin, ~ 500bp     | tubulin         | in vivo (GFP), wing          | Stark et al, 2005      |
| 73  | miR-278  | rtGEF     | CG10043   | 1          | 771        | tubulin, ~ 500bp     | tubulin         | in vivo (GFP), wing          | Stark et al, 2005      |
| 74  | miR-278  | Lar       | CG10443   | 0          | 1400       | tubulin, ~ 500bp     | tubulin         | in vivo (GFP), wing          | Stark et al, 2005      |
| 75  | miR-278  | -         | CG11539   | 0          |            | tubulin, ~ 500bp     | tubulin         | in vivo (GFP), wing          | Stark et al, 2005      |
| 76  | miR-278  | -         | CG1154    | 0          | 691        | tubulin, ~ 500bp     | tubulin         | in vivo (GFP), wing          | Stark et al, 2005      |
| 77  | miR-278  | -         | CG12187   | 0          | 2221       | tubulin, ~ 500bp     | tubulin         | in vivo (GFP), wing          | Stark et al, 2005      |



| no. | miRNA   | gene name    | CG number | functional | UTR length | miRNA promoter   | UTR promoter | Assay                    | Reference             |
|-----|---------|--------------|-----------|------------|------------|------------------|--------------|--------------------------|-----------------------|
| 78  | miR-278 | -            | CG14960   | 1          | 211        | tubulin, ~ 500bp | tubulin      | in vivo (GFP), wing      | Stark et al, 2005     |
| 79  | miR-278 | -            | CG15097   | 1          | 782        | tubulin, ~ 500bp | tubulin      | in vivo (GFP), wing      | Stark et al, 2005     |
| 80  | miR-278 | -            | CG15715   | 0          | 281        | tubulin, ~ 500bp | tubulin      | in vivo (GFP), wing      | Stark et al, 2005     |
| 81  | miR-278 | -            | CG15861   | 0          | 272        | tubulin, ~ 500bp | tubulin      | in vivo (GFP), wing      | Stark et al, 2005     |
| 82  | miR-278 | -            | CG16975   | 0          | 809        | tubulin, ~ 500bp | tubulin      | in vivo (GFP), wing      | Stark et al, 2005     |
| 83  | miR-278 | Vha100-1     | CG1709    | 0          | 296        | tubulin, ~ 500bp | tubulin      | in vivo (GFP), wing      | Stark et al, 2005     |
| 84  | miR-278 | lmg          | CG18042   | 0          | 1199       | tubulin, ~ 500bp | tubulin      | in vivo (GFP), wing      | Stark et al, 2005     |
| 85  | miR-278 | -            | CG18815   | 0          | 392        | tubulin, ~ 500bp | tubulin      | in vivo (GFP), wing      | Stark et al, 2005     |
| 86  | miR-278 | -            | CG1919    | 0          | 514        | tubulin, ~ 500bp | tubulin      | in vivo (GFP), wing      | Stark et al, 2005     |
| 87  | miR-278 | -            | CG30089   | 0          | 1309       | tubulin, ~ 500bp | tubulin      | in vivo (GFP), wing      | Stark et al, 2005     |
| 88  | miR-278 | -            | CG3026    | 0          | 755        | tubulin, ~ 500bp | tubulin      | in vivo (GFP), wing      | Stark et al, 2005     |
| 89  | miR-278 | Prosap       | CG30483   | 0          | 847        | tubulin, ~ 500bp | tubulin      | in vivo (GFP), wing      | Stark et al, 2005     |
| 90  | miR-278 | -            | CG31651   | 0          | 1727       | tubulin, ~ 500bp | tubulin      | in vivo (GFP), wing      | Stark et al, 2005     |
| 91  | miR-278 | -            | CG31841   | 0          |            | tubulin, ~ 500bp | tubulin      | in vivo (GFP), wing      | Stark et al, 2005     |
| 92  | miR-278 | -            | CG32057   | 0          | 1888       | tubulin, ~ 500bp | tubulin      | in vivo (GFP), wing      | Stark et al, 2005     |
| 93  | miR-278 | Hk           | CG32688   | 0          | 1200       | tubulin, ~ 500bp | tubulin      | in vivo (GFP), wing      | Stark et al, 2005     |
| 94  | miR-278 | -            | CG33006   | 0          | 2333       | tubulin, ~ 500bp | tubulin      | in vivo (GFP), wing      | Stark et al, 2005     |
| 95  | miR-278 | Gq30A        | CG33694   | 0          | 639        | tubulin, ~ 500bp | tubulin      | in vivo (GFP), wing      | Stark et al, 2005     |
| 96  | miR-278 | px           | CG4444    | 0          | 305        | tubulin, ~ 500bp | tubulin      | in vivo (GFP), wing      | Stark et al, 2005     |
| 97  | miR-278 | -            | CG6930    | 0          | 227        | tubulin, ~ 500bp | tubulin      | in vivo (GFP), wing      | Stark et al, 2005     |
| 98  | miR-278 | -            | CG7368    | 0          |            | tubulin, ~ 500bp | tubulin      | in vivo (GFP), wing      | Stark et al, 2005     |
| 99  | miR-278 | Rab3         | CG7576    | 0          | 2482       | tubulin, ~ 500bp | tubulin      | in vivo (GFP), wing      | Stark et al, 2005     |
| 100 | miR-278 | -            | CG7656    | 0          | 403        | tubulin, ~ 500bp | tubulin      | in vivo (GFP), wing      | Stark et al, 2005     |
| 101 | miR-278 | -            | CG9339    | 0          | 2420       | tubulin, ~ 500bp | tubulin      | in vivo (GFP), wing      | Stark et al, 2005     |
| 102 | miR-278 | DopR         | CG9652    | 0          | 637        | tubulin, ~ 500bp | tubulin      | in vivo (GFP), wing      | Stark et al, 2005     |
| 103 | miR-279 | nerfin-1     | CG13906   | 1          | 1622       | tubulin, ~ 500bp | tubulin      | in vitro (Luciferase)    | Stark et al, 2005     |
| 104 | miR-279 | JIL-1        | CG6297    | 0          | 1874       | tubulin, ~ 500bp | tubulin      | in vitro (Luciferase)    | Stark et al, 2005     |
| 105 | miR-279 | -            | CG6520    | 1          | 238        | tubulin, ~ 500bp | tubulin      | in vitro (Luciferase)    | Stark et al, 2005     |
| 106 | miR-2b  | -            | CG11293   | 0          | 150        | tubulin, ~ 500bp | tubulin      | in vivo (GFP), wing      | Stark et al, 2005     |
| 107 | miR-2b  | -            | CG1969    | 0          | 516        | tubulin, ~ 500bp | tubulin      | in vivo (GFP), wing      | Stark et al, 2005     |
| 108 | miR-2b  | -            | CG4269    | 1          | 149        | tubulin, ~ 500bp | tubulin      | in vivo (GFP), wing      | Stark et al, 2005     |
| 109 | miR-2b  | GLaz         | CG4604    | 1          | 161        | tubulin, ~ 500bp | tubulin      | in vivo (GFP), wing      | Stark et al, 2005     |
| 110 | miR-2b  | -            | CG7956    | 0          | 484        | tubulin, ~ 500bp | tubulin      | in vivo (GFP), wing      | Stark et al, 2005     |
| 111 | miR-6   | dpld         | CG1624    | 0          | 1524       | tubulin, ~ 500bp | tubulin      | in vitro (Luciferase)    | Stark et al, 2005     |
| 112 | miR-6   | E(spl)       | CG8365    | 1          |            | tubulin, ~ 500bp | tubulin      | in vitro (Luciferase)    | Stark et al, 2005     |
| 113 | miR-7   | -            | CG6520    | 0          | 238        | tubulin, ~ 500bp | tubulin      | in vitro (Luciferase)    | Stark et al, 2005     |
| 114 | miR-8   | fj           | CG10917   | 1          | 453        | tubulin, ~ 500bp | tubulin      | in vivo (GFP), wing      | Stark et al, 2005     |
| 115 | miR-8   | pygo         | CG11518   | 0          | 1064       | tubulin, ~ 500bp | tubulin      | in vivo (GFP), wing      | Stark et al, 2005     |
| 116 | miR-8   | Cf2          | CG11924   | 0          | 1732       | tubulin, ~ 500bp | tubulin      | in vivo (GFP), wing      | Stark et al, 2005     |
| 117 | miR-8   | -            | CG18622   | 0          | 314        | tubulin, ~ 500bp | tubulin      | in vivo (GFP), wing      | Stark et al, 2005     |
| 118 | miR-8   | -            | CG1882    | 1          | 235        | tubulin, ~ 500bp | tubulin      | in vivo (GFP), wing      | Stark et al, 2005     |
| 119 | miR-8   | disp         | CG2019    | 1          | 827        | tubulin, ~ 500bp | tubulin      | in vivo (GFP), wing      | Stark et al, 2005     |
| 120 | miR-8   | rn           | CG32466   | 1          | 304        | tubulin, ~ 500bp | tubulin      | in vivo (GFP), wing      | Stark et al, 2005     |
| 121 | miR-8   | rst          | CG4125    | 0          | 1608       | tubulin, ~ 500bp | tubulin      | in vivo (GFP), wing      | Stark et al, 2005     |
| 122 | miR-8   | -            | CG4484    | 0          | 252        | tubulin, ~ 500bp | tubulin      | in vivo (GFP), wing      | Stark et al, 2005     |
| 123 | miR-8   | wg           | CG4889    | 1          | 1069       | tubulin, ~ 500bp | tubulin      | in vivo (GFP), wing      | Stark et al, 2005     |
| 124 | miR-8   | -            | CG5735    | 1          | 599        | tubulin, ~ 500bp | tubulin      | in vivo (GFP), wing      | Stark et al, 2005     |
| 125 | miR-8   | -            | CG6210    | 1          | 614        | tubulin, ~ 500bp | tubulin      | in vivo (GFP), wing      | Stark et al, 2005     |
| 126 | miR-8   | MIP          | CG6456    | 1          | 471        | tubulin, ~ 500bp | tubulin      | in vivo (GFP), wing      | Stark et al, 2005     |
| 127 | miR-8   | -            | CG6634    | 1          | 897        | tubulin, ~ 500bp | tubulin      | in vivo (GFP), wing      | Stark et al, 2005     |
| 128 | miR-8   | Tie          | CG7525    | 1          | 538        | tubulin, ~ 500bp | tubulin      | in vivo (GFP), wing      | Stark et al, 2005     |
| 129 | miR-8   | Nedd4        | CG7555    | 0          | 1050       | tubulin, ~ 500bp | tubulin      | in vivo (GFP), wing      | Stark et al, 2005     |
| 130 | miR-8   | sd           | CG8544    | 0          | 1288       | tubulin, ~ 500bp | tubulin      | in vivo (GFP), wing      | Stark et al, 2005     |
| 131 | miR-92b | Tom          | CG5185    | 0          | 414        | tubulin, ~ 500bp | tubulin      | in vitro (Luciferase)    | Stark et al, 2005     |
| 132 | miR-2   | crq          | CG4280    | 1          | 767        | endogenous       | SV40         | S2 in vitro (Luciferase) | Gaul lab, unpublished |
| 133 | miR-2   | hep          | CG4353    | 1          | 1747       | endogenous       | SV40         | S2 in vitro (Luciferase) | Gaul lab, unpublished |
| 134 | miR-2   | ice          | CG7788    | 0          | 668        | endogenous       | SV40         | S2 in vitro (Luciferase) | Gaul lab, unpublished |
| 135 | miR-2   | scyl         | CG7590    | 1          | 1046       | endogenous       | SV40         | S2 in vitro (Luciferase) | Gaul lab, unpublished |
| 136 | miR-2   | drpr         | CG2086    | 0          | 710        | endogenous       | SV40         | S2 in vitro (Luciferase) | Gaul lab, unpublished |
| 137 | miR-2   | kay          | CG15509   | 1          | 1091       | endogenous       | SV40         | S2 in vitro (Luciferase) | Gaul lab, unpublished |
| 138 | miR-2   | pnr          | CG3978    | 1          | 605        | endogenous       | SV40         | S2 in vitro (Luciferase) | Gaul lab, unpublished |
| 139 | miR-184 | Gli          | CG3903    | 1          | 1095       | endogenous       | SV40         | S2 in vitro (Luciferase) | Gaul lab, this study  |
| 140 | miR-184 | Nrx          | CG6827    | 1          | 765        | endogenous       | SV40         | S2 in vitro (Luciferase) | Gaul lab, this study  |
| 141 | miR-184 | cora         | CG11949   | 0          | 438        | endogenous       | SV40         | S2 in vitro (Luciferase) | Gaul lab, this study  |
| 142 | miR-184 | Lac          | CG12369   | 1          | 768        | endogenous       | SV40         | S2 in vitro (Luciferase) | Gaul lab, this study  |
| 143 | miR-184 | ttk          | CG1856    | 1          | 1697       | endogenous       | SV40         | S2 in vitro (Luciferase) | Gaul lab, this study  |
| 144 | miR-184 | Cont         | CG1084    | 1          | 254        | endogenous       | SV40         | S2 in vitro (Luciferase) | Gaul lab, this study  |
| 145 | miR-184 | nrv2         | CG9261    | 0          | 878        | endogenous       | SV40         | S2 in vitro (Luciferase) | Gaul lab, this study  |
| 146 | miR-184 | -            | CG7161    | 1          | 102        | endogenous       | SV40         | S2 in vitro (Luciferase) | Gaul lab, this study  |
| 147 | miR-184 | trio         | CG18214   | 0          | 2107       | endogenous       | SV40         | S2 in vitro (Luciferase) | Gaul lab, this study  |
| 148 | miR-184 | -            | CG12789   | 1          | 284        | endogenous       | SV40         | S2 in vitro (Luciferase) | Gaul lab, this study  |
| 149 | miR-184 | activin-beta | CG11062   | 1          | 567        | endogenous       | SV40         | S2 in vitro (Luciferase) | Gaul lab, this study  |
| 150 | miR-184 | chp          | CG1744    | 1          | 455        | endogenous       | SV40         | S2 in vitro (Luciferase) | Gaul lab, this study  |
| 151 | miR-184 | -            | CG12880   | 1          | 679        | endogenous       | SV40         | S2 in vitro (Luciferase) | Gaul lab, this study  |
| 152 | miR-184 | -            | CG6583    | 1          | 517        | endogenous       | SV40         | S2 in vitro (Luciferase) | Gaul lab, this study  |
| 153 | miR-184 | rn           | CG32466   | 1          | 304        | endogenous       | SV40         | S2 in vitro (Luciferase) | Gaul lab, this study  |
| 154 | miR-184 | sinu         | CG10624   | 1          | 1282       | endogenous       | SV40         | S2 in vitro (Luciferase) | Gaul lab, this study  |
| 155 | miR-184 | -            | CG1298    | 1          | 168        | endogenous       | SV40         | S2 in vitro (Luciferase) | Gaul lab, this study  |
| 156 | miR-184 | Mega         | CG14779   | 1          | 386        | endogenous       | SV40         | S2 in vitro (Luciferase) | Gaul lab, this study  |
| 157 | miR-9a  | bTub60D      | CG3401    | 1          | 956        | actin ~ 200bp    | tubulin      | S2 in vitro (Luciferase) | Rehwinkel et al, 2006 |

| no. | miRNA   | gene name | CG number | functional | UTR length | miRNA promoter | UTR promoter | Assay                    | Reference             |
|-----|---------|-----------|-----------|------------|------------|----------------|--------------|--------------------------|-----------------------|
| 158 | miR-2b  |           | CG4851    | 1          | 259        | actin ~ 200bp  | tubulin      | S2 in vitro (Luciferase) | Rehwinkel et al, 2006 |
| 159 | miR-13a |           | CG4851    | 0          | 259        | actin ~ 200bp  | tubulin      | S2 in vitro (Luciferase) | Rehwinkel et al, 2006 |
| 160 | miR-2b  | Sema-1b   | CG6446    | 0          | 1473       | actin ~ 200bp  | tubulin      | S2 in vitro (Luciferase) | Rehwinkel et al, 2006 |
| 161 | miR-14  | Sema-1b   | CG6446    | 0          | 1473       | actin ~ 200bp  | tubulin      | S2 in vitro (Luciferase) | Rehwinkel et al, 2006 |
| 162 | miR-2b  |           | CG10011   | 0          | 1464       | actin ~ 200bp  | tubulin      | S2 in vitro (Luciferase) | Rehwinkel et al, 2006 |
| 163 | miR-9a  |           | CG10011   | 1          | 1464       | actin ~ 200bp  | tubulin      | S2 in vitro (Luciferase) | Rehwinkel et al, 2006 |
| 164 | miR-9b  |           | CG10011   | 0          | 1464       | actin ~ 200bp  | tubulin      | S2 in vitro (Luciferase) | Rehwinkel et al, 2006 |
| 165 | miR-12  |           | CG10011   | 1          | 1464       | actin ~ 200bp  | tubulin      | S2 in vitro (Luciferase) | Rehwinkel et al, 2006 |
| 166 | miR-9b  | Vha68-1   | CG12403   | 1          | 647        | actin ~ 200bp  | tubulin      | S2 in vitro (Luciferase) | Rehwinkel et al, 2006 |
| 167 | miR-9a  |           | CG12505   | 1          | 1513       | actin ~ 200bp  | tubulin      | S2 in vitro (Luciferase) | Rehwinkel et al, 2006 |
| 168 | miR-9b  |           | CG12505   | 0          | 1513       | actin ~ 200bp  | tubulin      | S2 in vitro (Luciferase) | Rehwinkel et al, 2006 |
| 169 | miR-14  |           | CG12505   | 0          | 1513       | actin ~ 200bp  | tubulin      | S2 in vitro (Luciferase) | Rehwinkel et al, 2006 |
| 170 | miR-2b  |           | CG15385   | 0          | 677        | actin ~ 200bp  | tubulin      | S2 in vitro (Luciferase) | Rehwinkel et al, 2006 |
| 171 | miR-9b  |           | CG30337   | 0          | 302        | actin ~ 200bp  | tubulin      | S2 in vitro (Luciferase) | Rehwinkel et al, 2006 |
| 172 | miR-12  |           | CG30337   | 0          | 302        | actin ~ 200bp  | tubulin      | S2 in vitro (Luciferase) | Rehwinkel et al, 2006 |
| 173 | miR-2b  |           | CG31886   | 1          | 541        | actin ~ 200bp  | tubulin      | S2 in vitro (Luciferase) | Rehwinkel et al, 2006 |
| 174 | miR-12  |           | CG31886   | 1          | 541        | actin ~ 200bp  | tubulin      | S2 in vitro (Luciferase) | Rehwinkel et al, 2006 |
| 175 | miR-9a  |           | CG33087   | 1          | 323        | actin ~ 200bp  | tubulin      | S2 in vitro (Luciferase) | Rehwinkel et al, 2006 |
| 176 | miR-9b  |           | CG33087   | 0          | 323        | actin ~ 200bp  | tubulin      | S2 in vitro (Luciferase) | Rehwinkel et al, 2006 |
| 177 | miR-9a  | nerfin-1  | CG13906   | 0          | 1622       | actin ~ 200bp  | tubulin      | S2 in vitro (Luciferase) | Rehwinkel et al, 2006 |
| 178 | miR-9b  | nerfin-1  | CG13906   | 1          | 1622       | actin ~ 200bp  | tubulin      | S2 in vitro (Luciferase) | Rehwinkel et al, 2006 |
| 179 | miR-9a  |           | CG1172    | 1          | 1009       | actin ~ 200bp  | tubulin      | S2 in vitro (Luciferase) | Rehwinkel et al, 2006 |
| 180 | miR-9b  |           | CG1172    | 0          | 1009       | actin ~ 200bp  | tubulin      | S2 in vitro (Luciferase) | Rehwinkel et al, 2006 |
| 181 | miR-13a | Reg-5     | CG2928    | 0          | 285        | actin ~ 200bp  | tubulin      | S2 in vitro (Luciferase) | Rehwinkel et al, 2006 |
| 182 | miR-13a |           | CG3799    | 1          | 260        | actin ~ 200bp  | tubulin      | S2 in vitro (Luciferase) | Rehwinkel et al, 2006 |
| 183 | miR-13a |           | CG5977    | 0          | 1030       | actin ~ 200bp  | tubulin      | S2 in vitro (Luciferase) | Rehwinkel et al, 2006 |
| 184 | miR-13a | Tab2      | CG7417    | 0          | 391        | actin ~ 200bp  | tubulin      | S2 in vitro (Luciferase) | Rehwinkel et al, 2006 |
| 185 | miR-9b  | htt       | CG9995    | 0          | 737        | actin ~ 200bp  | tubulin      | S2 in vitro (Luciferase) | Rehwinkel et al, 2006 |
| 186 | miR-9a  | brat      | CG10719   | 0          | 1313       | actin ~ 200bp  | tubulin      | S2 in vitro (Luciferase) | Rehwinkel et al, 2006 |
| 187 | miR-13a |           | CG18604   | 0          | 1017       | actin ~ 200bp  | tubulin      | S2 in vitro (Luciferase) | Rehwinkel et al, 2006 |
| 188 | miR-14  |           | CG18604   | 0          | 1017       | actin ~ 200bp  | tubulin      | S2 in vitro (Luciferase) | Rehwinkel et al, 2006 |
| 189 | miR-9a  |           | CG31712   | 1          | 507        | actin ~ 200bp  | tubulin      | S2 in vitro (Luciferase) | Rehwinkel et al, 2006 |
| 190 | miR-9b  |           | CG31712   | 0          | 507        | actin ~ 200bp  | tubulin      | S2 in vitro (Luciferase) | Rehwinkel et al, 2006 |

## References

- Brennecke, J., Hipfner, D. R., Stark, A., Russell, R. B. & Cohen, S. M. bantam encodes a developmentally regulated microRNA that controls cell proliferation and regulates the proapoptotic gene hid in Drosophila. *Cell* 113, 25-36 (2003).
- Brennecke, J., Stark, A., Russell, R. B. & Cohen, S. M. Principles of microRNA-target recognition. *PLoS Biol* 3, e85 (2005).
- Burgler, C. & Macdonald, P. M. Prediction and verification of microRNA targets by MovingTargets, a highly adaptable prediction method. *BMC Genomics* 6, 88 (2005).
- Kwon, C., Han, Z., Olson, E. N. & Srivastava, D. MicroRNA1 influences cardiac differentiation in Drosophila and regulates Notch signaling. *Proc Natl Acad Sci U S A* 102, 18986-91 (2005).
- Lai, E. C., Tam, B. & Rubin, G. M. Pervasive regulation of Drosophila Notch target genes by GY-box-, Brd-box-, and K-box-class microRNAs. *Genes Dev* 19, 1067-80 (2005).
- Leaman, D., Chen, P.Y., Fak, J., Yalcin, A., Pearce, M., Unnerstall, U., Marks, D.S., Sander, C., Tuschl, T. & Gaul, U. Antisense-mediated depletion reveals essential and specific functions of microRNAs in Drosophila development. *Cell* 121, 1097-108 (2005).
- Li, X. & Carthew, R. W. A microRNA mediates EGF receptor signaling and promotes photoreceptor differentiation in the Drosophila eye. *Cell* 123, 1267-77 (2005).
- Li, Y., Wang, F., Lee, J. A. & Gao, F. B. MicroRNA-9a ensures the precise specification of sensory organ precursors in Drosophila. *Genes Dev* 20, 2793-805 (2006).
- Rehwinkel, J., Natalin, P., Stark, A., Brennecke, J., Cohen, S. M. & Izaurralde, E. Genome-wide analysis of mRNAs regulated by Drosha and Argonaute proteins in Drosophila melanogaster. *Mol Cell Biol* 26, 2965-75 (2006).
- Robins, H., Li, Y. & Padgett, R. W. Incorporating structure to predict microRNA targets. *Proc Natl Acad Sci U S A* 102, 4006-9 (2005).
- Ronshaugen, M., Biemar, F., Piel, J., Levine, M. & Lai, E. C. The Drosophila microRNA iab-4 causes a dominant homeotic transformation of halteres to wings. *Genes Dev* 19, 2947-52 (2005).
- Stark, A., Brennecke, J., Russell, R. B. & Cohen, S. M. Identification of Drosophila MicroRNA targets. *PLoS Biol* 1, E60 (2003).
- Stark, A., Brennecke, J., Bushati, N., Russell, R. B. & Cohen, S. M. Animal MicroRNAs confer robustness to gene expression and have a significant impact on 3'UTR evolution. *Cell* 123, 1133-46 (2005).
- Teleman, A. A., Maitra, S. & Cohen, S. M. Drosophila lacking microRNA miR-278 are defective in energy homeostasis. *Genes Dev* 20, 417-22 (2006).

**Supplementary Table 3: Overlap between PITA predictions and other microRNA target prediction methods, and among other methods.** (a) Comparison between PITA predictions and other methods. For each comparison, shown is the number of targets predicted by the compared method, and the number of these targets that are also predicted by PITA (overlap column). For the PITA predictions, we selected its k highest ranking targets, where k in each comparison is equal to the number of targets predicted by the compared method. (b) Comparison between existing microRNA target prediction methods. For each pair of compared methods, shown is the number of targets of each method, and the overlap. The overlap percentage is given in respect to each of the compared prediction set sizes.

(a)

| Organism | Method      | Num. Targets | Overlap | Overlap (%) |
|----------|-------------|--------------|---------|-------------|
| Human    | PicTar      | 55,840       | 14,362  | 25          |
|          | TargetScan  | 40,482       | 7,435   | 18          |
|          | miRanda     | 5,895        | 386     | 6           |
| Mouse    | PicTar      | 51,895       | 8,573   | 16          |
|          | TargetScan  | 31,683       | 2,983   | 9           |
| Fly      | Stark       | 12,619       | 3,877   | 30          |
|          | PicTar (s1) | 10,105       | 2,869   | 28          |
|          | PicTar (s3) | 5,224        | 1,023   | 19          |
|          | miRanda     | 10,230       | 2,660   | 26          |

(b)

| Organism | Method I    | N. Targets I | Method II   | N. Targets II | Overlap | Overlap (%) |
|----------|-------------|--------------|-------------|---------------|---------|-------------|
| Human    | PicTar      | 55,840       | TargetScan  | 40,482        | 13,010  | 23 / 32     |
|          | PicTar      | 55,840       | miRanda     | 5,895         | 2,148   | 3 / 36      |
|          | TargetScan  | 40,482       | miRanda     | 5,895         | 880     | 2 / 14      |
| Mouse    | PicTar      | 51,895       | TargetScan  | 31,683        | 9,594   | 14 / 23     |
| Fly      | Stark       | 12,619       | PicTar (s1) | 10,105        | 3,455   | 51 / 64     |
|          | Stark       | 12,619       | PicTar (s3) | 5,224         | 3,773   | 29 / 72     |
|          | Stark       | 12,619       | miRanda     | 10,230        | 3,164   | 25 / 30     |
|          | PicTar (s1) | 10,105       | miRanda     | 10,230        | 3,455   | 34 / 33     |
|          | PicTar (s3) | 5,224        | miRanda     | 10,230        | 2,178   | 41 / 21     |

#### Supplementary Table 4: Sequences of constructs used in our experiments.

Sequences are given in FASTA format, with putative microRNA binding site marked in green.

>grim\_UTR

```
GGTTTCCATATTTTCATCCTGGTGGAGAGAAAATCTTTGGGATTTTCTGGGAAAGGCAGGCTCAA  
TCAAAGCGCATTGTGATTTCTTTTTTGGGTATGGACACATGAGGAGGAACGAGTTTTGTAAAAC  
ATGGGATATTTCCACAACAAAATAAGAAAATATTTTTAAACTATTTTTGAGAGAGAGAAAAT  
CAAAATTTGTCATCGACTTGCTTAAAGTGATTTTGGTTGTTTGTACTTTTTTGGATGTCAAAT  
TTTCCGATATAAGTTTTGAAAAATGTTAATTTTGAAGCAAAGGTTCCCGGTTGGTTCAA  
TACATAAACATACTTAAACAACATTTAGAGAGCATAAAGAGAAATGTGTAATAATGTCATAAAC  
TTATTAGTGTCTATACGTATGAGCAAAACCACAAGTATCGTACTCAACTAACAAATAATTGTCA  
AATTTTCTACTTCAACTACTTCAACTACATTTCAACTACTTACAAATATAAATCGTAAACTAAT  
ATTACAGAACTACAATACAGAACCAACAACAAAACAAAGATGCAACCGCAGCAACAAGAATAAC  
AAAAGACAACAACCTCAATTGTACAAAATAGATTTTAAGCAAACAGCAAATTTTATATGTTTACA  
ACAAAGAGAGAAAATACAAAACGTCTACAAAAAATAGAATACAAGAACCGCCGAACAGAATACA  
TTTTAACAAAAATTAACAACAACAACAACAAACATTTAAGCAATTTTGATACGAATAATCAAGA  
ATAACAATAATTTGAAATGTATCTTATCATTATTATTGATTTTAGCAAAATTCAAAACATATTAT  
TTTAATTTTGGCATTGCAAATTAACAAGAAATATTGAAATTAATCACATGTAAAGATAGCATT  
TGTAAGAAATTAATAATTTTATAAGACAACAAGCAAAAAATAAATACAATTTTATAAAAAAT
```

>grim\_N

```
ATTTGGTTTCCATATTTTCATCCTGGTGGAGAGAAAATCTTTGGGATTTTCTCGAGAAGGCAGGC  
TCAATCAAAGCGCATTGTGATTTCTTTTTTGGGTGCGGCCGCATGAGGAGGAACGAGTTTTGTA  
AAACATGGGATATTTCCACAACAAAATAAGAAAATATTTTTAAACTATTTTTGAGAGAGAGAA  
AATTCAAATTTGT
```

>grim\_C

```
ATTTGGTTTCCATATTTTCATCCTGGTGGAGAGAAAATCTTTGGGATTTTCTCGAGAAGGCAAAT  
CACAATGCGCTTTGATTGAGCCGTTTGGCTCAATCAAAGCGCATTGTGATTTCTTTTTTGGGT  
GCGGCCGCATGAGGAGGAACGAGTTTTGTAAAACATGGGATATTTCCACAACAAAATAAGAAA  
CTATTTTTTAAACTA
```

>grim\_Δ5

```
ATTTGGTTTCCATATTTTCATCCTGGTGGAGAGAAAATCTTTGGGATTTTCTCGAGAAGGCAGGC  
TCAATCAAAGCGCATTTCTTTTTTGGGTGCGGCCGCATGAGGAGGAACGAGTTTTGTAAAACATG  
GGATATTTCCACAACAAAATAAGAAAATATTTTTAAACTATTTTTGAGAGAGAGAAAATTCAA  
AATTTGT
```

>grim\_Δ

```
ATTTGGTTTCCATATTTTCATCCTGGTGGAGAGAAAATCTTTGGGATTTTCTCGAGGCCGCCGCA  
TGAGGAGGAACGAGTTTTGTAAAACATGGGATATTTCCACAACAAAATAAGAAAATATTTTTTA  
AACTATTTTTTGGAGAGAGAGAAAATTCAAAATTTGT
```

>hid\_UTR

```
AAGCGCAGGAGACGTGTAATCGAATGATCTATAGTGAAATCAGCTAGCCCTTAAGATATATGCC  
GATCTAAACATAGTTGTAGTTAAACCGTACATAAGTGCAACGAATTTATTGAACTGCAGGAGCG  
AAAGCAGAAAGTCATTAATTCGTAAACGGATTGTTAGATACACAAACAGCCAACATACACGAAG  
AGTGTGCCTAAGATTAAGAAGGTTGACGGGACACAAGAACAATATATCTATCTGTCTATGGTA
```

ACTGCATTTGTATTTCTAAAACGAAACGAAAGATAACAATCTTAACTGCTCAAAGTAATGAAAA  
CTCTTAGACTGGCAAGAGACTCAAATCACACTTATTTTTTTGCTGATCCATATTTTTGTACAAC  
CTTTTGAGCGATATTTACAAATTATACTAGTACAAAAAAGAGAGAGAGATAAGCAAAGA  
AAACTGCCACTTTTGAGATACTTTTGATAATCTTTGATTTGCATTTAATCATTTCCACACTTGC  
ATTTTTTATAAAACAACAACAAAATTACTTCCATTGTAGAACAAGTAAACTGCAATTTCAATG  
TCTTCGCATTTGTAATTCGGAATTGCAAGAAAAACAAAATATTTTAAATATGTTTAACTAGTA  
GAATTTTTTAAACGTAAGTCCACAAAAACAAGCACATCTAGCTTTAATTTGTTGAAACAAAAGCA  
GAAAAACGCAACAAAAAATGAATGAAAATCATTAATTAATTTTTGTATATAGTTTTTATGCC  
ATTTTTGTGATGTTTTGTGTCTACGGTTTATGTCATGTTATTTTAGTTAAATTTCTTATGATTT  
ATGTTTATTTGTAATATTTTTTGTTCATTGTTTGTTCATCATCATATTCAAATGGTCTCACAAT  
ATAATAGTTTTAAGCTCCACGCCCGGAGATTGATGGCAAAACGATTGAAATTTGGCCAGAAGA  
GAGATAGTTTTCCCATTCGTACACAGTCTTTTTTGGAAATGCACATTAATGATCTCTCACAATG  
GAAATTAATGAAAATTGATCTCCGCAGCTAGCCAAAGTTAAAAAAGAAATGAAGAGGAAAACAT  
ATTCTATAGGCAATTTTCACTATATGCTAGAATTTCCCGGGCGTTTCAATGCTAATCGAATACA  
GTGACATGAAAGCAAACATAGCGAAAATATTAAGAAAATCAATCAAAAAGAAAAGAAAACCAAT  
TCCCAAAAATCGCATTGATCTCATGGATTTATACAATACAATTACATCAACCGTTTTTTTTACAA  
TGAGAAATGTTATAAAAAGCAGAAAGTGAAACACAGAAACATAAACAAAAATTAACGAAAAGCT  
TAGATATAAGTTCGCCAAGCGTTTTAGTTCATTTTTCTAGAATGTCTAAGTTGGTTTTAGTGAGT  
TTATTAAGCTGTCTTCGGACACAAGTTTATTTGTATATAAGCAATATTATTTGTGTAGCCTAAG  
TGACAGTCCCAATCAAATCCAATCCAATATCACCCAGTCCCGGACATTTCCAGCAAAAACAATA  
GACTATTCTCGCGTTCACATGTATCAATCTTAATTTGAATTACCACAAAATGAAATGAAATACT  
AAAACCATACACAAATGAAAAATTATTTTTGTAAATTGTTTGCATCAAGTGAGCAAGGGGATTA  
GATTAAGGAATCATCCTTGCTTTATCCCCTGCTTATTGCTAATTAGTTTTTACAAATGATCTCGG  
TAAAGTTTTGTGGCCTTGCGCCAAAAGTCGTACAGATTTTTGGTTTTGCCATAAATACTCGAAC  
AAAAGTTAATGAAAAACGAAGCAAATGGAAAAAATCAGAATGAAACACAAGAAATTTATAT  
TTTTGACCCAATGCTACTTAATCCGTTTTTGTAAATTAAGTATCTTTACTCGACCTTGTATATA  
GCGCAGTTCGAATCACAGAATCAAATGCCATTTTTGTATAGAATTTTTATTTGGTGCCAAAACAG  
TGACAGATAATTAATGTCTATGAACCCGTGTATTTTCGCATATTATACATTTATACATATATCG  
TAACTTCAATGATAAGTTTGATTCTGAAATTTTGTCAACTCAATTTAAGAAACATTTCTGTTGT  
AGTTTAGTGATTGCTAGCAGAAAGCACTTTGTTAATTTGTACATTTTATATTATGCTGTAATAT  
TTTAATATACATAAATATCATTATTGATCTCATGAATATGTTTATAAGACAACAAAAATTTATAT  
ATATGAATACATCTATGTGTATGTGTAAA

>hid\_N

AATGAAAAATTATTTTTGTAAATTGTTTGCATCAAGTGAGCAAGGGGATTAGATTAAGGAATCA  
TCCTCGAGTTATCCCCTGCTTATTGCTAATTAGTTTTTACAAATGATCTCGGTAAGTTTTGCGG  
CCGCGCGCCAAAAGTCGTACAGATTTTTGGTTTTGCCATAAATACTCGAACAAAAAGTTAATGA  
AAAACGAAGCAAA

>hid\_c

AATGAAAAATTATTTTTGTAAATTGTTTGCATCAAGTGAGCAAGGGGATTAGATTAAGGAATCA  
TCCTCGAGTTATCCCCTGCTTATTGCTAATTAGTTTTTACAAATGATCTCGGACTACCGAGATCA  
TTGTGAAAATAATTAGTAAAGTTTTGCGGCCGCGCCAAAAGTCGTACAGATTTTTGGTTTT  
GCCATAAATACTC

>hid\_Δ5

AATGAAAAATTATTTTTGTAAATTGTTTGCATCAAGTGAGCAAGGGGATTAGATTAAGGAATCA  
TCCTCGAGTTATCCCCTGCTTATTGCTAATTAGTTTTTACCGTAAAGTTTTGCGGCCGCGGCC

AAAAGTCGTACAGATTTTTGGTTTGCCATAAATACTCGAACAAAAAGTTAATGAAAAACGAAGC  
AAA

>hid\_Δ

TCGACAATGAAAAATTATTTTTGTAAATTGTTTGCATCAAGTGAGCAAGGGGATTAGATTAAGG  
AATCATCCTCGAGGCGGCCGCGCGCCCAAAAGTCGTACAGATTTTTGGTTTGCCATAAATACTC  
GAACAAAAAGTTAATGAAAAACGAAGCAA

>rpr\_N

CCAAACACAGTCACCACTCATCAGCCGACGGCACTCGATTTCTACTGCAGTCAAGGACCTCGAG  
CCACAACACCCACCCAATTTTAGTTTTACTCATCAAAGCGATTGTGATAATGGTTTTGTTTCTAC  
AAAAAAGCGGCCGCAAAATTTGAAAAAATAACGTTTTTATAAAGTCCCAATTTTTTACAAAA  
TGTTTCAATGA

>rpr\_C

ACGGCACTCGATTTCTACTGCAGTCAAGGACCTCGAGCCACAACACCCACCCAATTTTAGTTTT  
TATCACAATCGCTTTGATGAGTAATAACTCATCAAAGCGATTGTGATAATGGTTTTGTTTCTAC  
AAAAAAGCGGCCGCAAAATTTGAAAAAATAACGTTTTTATAAAGTCCCAATTTTTTACAAAA  
TGTTTCAATGA

>rpr\_C3

TCATCAGCCGACGGCACTCGATTTCTACTGCAGTCAAGGACCTCGAGCCACAACACCCACCCAA  
TTTTAGTTTTCGCTTTGATGAGTTCTTACTCATCAAAGCGATTGTGATAATGGTTTTGTTTCTAC  
AAAAAAGCGGCCGCAAAATTTGAAAAAATAACGTTTTTATAAAGTCCCAATTTTTTACAAAA  
TGTTTCAATGA

>rpr\_C3+

ACGGCACTCGATTTCTACTGCAGTCAAGGACCTCGAGCCACAACACCCACCCACGCTTTGATGA  
GTAAACTAAAATTTCTTATTTTAGTTTTACTCATCAAAGCGATTGTGATAATGGTTTTGTTTCTAC  
AAAAAAGCGGCCGCAAAATTTGAAAAAATAACGTTTTTATAAAGTCCCAATTTTTTACAAAA  
TGTTTCAATGA

>rpr\_C5

CCAAACACAGTCACCACTCATCAGCCGACGGCACTCGATTTCTACTGCAGTCAAGGACCTCGAG  
CCACAACACCCACCCAATTTTACCGGACTCATCAAAGCGATTGTGATAATTTCTTATCACAATC  
CTGCGTTCCCAATGGTTTTGTTTCTACAAAAAAGCGGCCGCAAAAGGCCAAAAATAACGTTTTT  
ATAATCACCCC

>rpr\_C5+

CCAAACACAGTCACCACTCATCAGCCGACGGCACTCGATTTCTACTGCAGTCAAGGACCTCGAG  
CCACAACACCCACCCAATTTTAGTTTTACTCATCAAAGCGATTGTGATAATGGTTTTGTTTTTCT  
AAACAAAACCATTTATCACAATCTACAAAAAAGCGGCCGCAAAATTTGAAAAAATAACGTTTTTA  
TAAAGTCCCA

>rpr\_M2

CCAAACACAGTCACCACTCATCAGCCGACGGCACTCGATTTCTACTGCAGTCAAGGACCTCGAG  
CCACAACACCCACCCAATTTTAGTTTTACTCATCAAAGCGATTGTGACAAATGGTTTTGTTTCTAC  
AAAAAAGCGGCCGCAAAATTTGAAAAAATAACGTTTTTATAAAGTCCCAATTTTTTACAAAA  
TGTTTCAATGA

>rpr\_M3  
CCAAACACAGTCACCACTCATCAGCCGACGGCACTCGATTTCTACTGCAGTCAAGGACCTCGAG  
CCACAACACCCACCCAATTTTAGTTTACTCATCAAAGCGATTGTGCTAATGGTTTTGTTTCTAC  
AAAAAAGCGGCCGCAAATTTGAAAAAATAACGTTTTTATAAAGTCCCCAATTTTTTACAAAA  
TGTTTCAATGA

>rpr\_M6  
CCAAACACAGTCACCACTCATCAGCCGACGGCACTCGATTTCTACTGCAGTCAAGGACCTCGAG  
CCACAACACCCACCCAATTTTAGTTTACTCATCAAAGCGATTATGATAATGGTTTTGTTTCTAC  
AAAAAAGCGGCCGCAAATTTGAAAAAATAACGTTTTTATAAAGTCCCCAATTTTTTACAAAA  
TGTTTCAATGA

>rpr\_I5  
CCAAACACAGTCACCACTCATCAGCCGACGGCACTCGATTTCTACTGCAGTCAAGGACCTCGAG  
CCACAACACCCACCCAATTTTAGTTTACTCATCAAAGCGATTGTGGATAATGGTTTTGTTTCTA  
CAAAAAGCGGCCGCAAATTTGAAAAAATAACGTTTTTATAAAGTCCCCAATTTTTTACAAAA  
ATGTTTCAATGA

>rpr\_Δ5  
CCAAACACAGTCACCACTCATCAGCCGACGGCACTCGATTTCTACTGCAGTCAAGGACCTCGAG  
CCACAACACCCACCCAATTTTAGTTTACTCATCAAAGCGATGGTTTTGTTTCTACAAAAAAGCG  
GCCGCAAATTTGAAAAAATAACGTTTTTATAAAGTCCCCAATTTTTTACAAAAATGTTTCAAT  
GA

>rpr\_Δ  
TCGTGCACCAAACACAGTCACCACTCATCAGCCGACGGCACTCGATTTCTACTGCAGTCAAGGA  
CCTCGAGGCGGCCGCAAATTTGAAAAAATAACGTTTTTATAAAGTCCCCAATTTTTTACAAAA  
ATGTTTCAATGA

>grim\_N>rpr  
CCAAACACAGTCACCACTCATCAGCCGACGGCACTCGATTTCTACTGCAGTCAAGGACCTCGAG  
AAGGCAAGCTCAATCAAAGCGCATTGTGATTCTTTTTTGGGTGCGGCCGCAAATTTGAAAA  
ATAACGTTTTTATAAAGTCCCCAATTTTTTACAAAAATGTTTCAATGA

>grim\_C>rpr  
CCAAACACAGTCACCACTCATCAGCCGACGGCACTCGATTTCTACTGCAGTCAAGGACCTCGAG  
AAGGCAAATCACAATGCGTTTTGATTGAGCCGTTTTGGCTCAATCAAAGCGCATTGTGATTCT  
TTTTTGGGTGCGGCCGCAAATTTGAAAAAATAACGTTTTTATAAAGTCCCCAATTTTTTACAA  
AAATGTTTCAATGA

>grim\_Δ5>rpr  
CCAAACACAGTCACCACTCATCAGCCGACGGCACTCGATTTCTACTGCAGTCAAGGACCTCGAG  
AAGGCAAGCTCAATCAAAGCGCATTCTTTTTTGGGTGCGGCCGCAAATTTGAAAAAATAACG  
TTTTTATAAAGTCCCCAATTTTTTACAAAAATGTTTCAATGA

>grim\_N>hid  
AATGAAAAATTATTTTTGTAAATTGTTTGCATCAAGTGAGCAAGGGGATTAGATTAAGGAATCA  
TCCTCGAGAAGGCAAGCTCAATCAAAGCGCATTGTGATTCTTTTTTGGGTGCGGCCGCGGCC

CAAAAGTCGTACAGATTTTTGGTTTGCCATAAATACTCGAACAAAAAGTTAATGAAAAACGAAG  
CAAA

>grim\_C>hid

AATGAAAAATTATTTTTGTAAATTGTTTGCATCAAGTGAGCAAGGGGATTAGATTAAGGAATCA  
TCCTCGAGAAGGCAAATCACAATGCGCTTTGATTGAGCCGGTTTGGCTCAATCAAAGCGCATTG  
TGATTTCTTTTTGGGTGCGGCCGCGCCCCAAAAGTCGTACAGATTTTTGGTTTGCCATAAAT  
ACTCGAACAAAAAGTTAATGAAAAACGAAGCAAA

>grim\_Δ5>hid

AATGAAAAATTATTTTTGTAAATTGTTTGCATCAAGTGAGCAAGGGGATTAGATTAAGGAATCA  
TCCTCGAGAAGGCAAGCTCAATCAAAGCGCATTCTTTTTTGGGTGCGGCCGCGCCCCAAAAGT  
CGTACAGATTTTTGGTTTGCCATAAATACTCGAACAAAAAGTTAATGAAAAACGAAGCAAA

>hid\_N>rpr

CCAAACACAGTCACCACTCATCAGCCGACGGCACTCGATTTCTACTGCAGTCAAGGACcTCGAG  
TTATCCCCTGCTTATTGCTAATTAGTTTTCACAATGATCTCGGTAAAGTTTTGCGGCCGCAAAA  
TTTTGAAAAATAACGTTTTTATAAAGTCCCCAATTTTTTACAAAAATGTTTCAATGA

>hid\_C>rpr

CCAAACACAGTCACCACTCATCAGCCGACGGCACTCGATTTCTACTGCAGTCAAGGACcTCGAG  
TTATCCCCTGCTTATTGCTAATTAGTTTTCACAATGATCTCGGACTACCGAGATCATTGTGAAA  
ACTAATTAGTAAAGTTTTGCGGCCGCAAAAATTTGAAAAATAACGTTTTTATAAAGTCCCCAAT  
TTTTTACAAAAATGTTTCAATGA

>hid\_Δ5> rpr

CCAAACACAGTCACCACTCATCAGCCGACGGCACTCGATTTCTACTGCAGTCAAGGACCTCGAG  
TTATCCCCTGCTTATTGCTAATTAGTTTTCACGTAAAGTTTTGCGGCCGCAAAAATTTGAAAAAA  
TAACGTTTTTATAAAGTCCCCAATTTTTTACAAAAATGTTTCAATGA

>hid\_N>grim

ATTTGGTTTCCATATTTTCATCCTGGTGGAGAGAAAATCTTTGGGATTTTCTCGAGTTATCCCCT  
GCTTATTGCTAATTAGTTTTCACAATGATCTCGGTAAAGTTTTGCGGCCGCATGAGGAGGAACG  
AGTTTTGTAAACATGGGATATTTCCACAACAAAATAAGAAAACATTTTTTAACTATTTTTGA  
GAGAGAGAAAATTCAAAATTTGT

>hid\_C>grim

ATTTGGTTTCCATATTTTCATCCTGGTGGAGAGAAAATCTTTGGGATTTTCTCGAGTTATCCCCT  
GCTTATTGCTAATTAGTTTTCACAATGATCTCGGACTACCGAGATCATTGTGAAAACATAATTAG  
TAAAGTTTTGCGGCCGCATGAGGAGGAACGAGTTTTGTAAACATGGGATATTTCCACAACAAA  
ATAAGAAAACATTTTTTAACTATTTTTGAGAGAGAGAAAATTCAAAATTTGT

>hid\_Δ5> grim

ATTTGGTTTCCATATTTTCATCCTGGTGGAGAGAAAATCTTTGGGATTTTCTCGAGTTATCCCCT  
GCTTATTGCTAATTAGTTTTCACGTAAAGTTTTGCGGCCGCATGAGGAGGAACGAGTTTTGTAA  
AACATGGGATATTTCCACAACAAAATAAGAAAACATTTTTTAACT

>rpr\_N>grim



ATTTGGTTTCCATATTTTCATCCTGGTGGAGAGAAAATCTTTGGGATTTTCTCGAGCCACAACAC  
CCACCCAATTTTAGTTTTACTCATCAAAGCGATTGTGATAATGGTTTTGTTTCTACAAAAAAGCG  
GCCGCATGAGGAGGAACGAGTTTTGTAAAACATGGGATATTTCCACAACAAAATAAGAAAATA  
TTTTTAACTATTTTTGAGAGAGAGAAAATTCAAAATTTGT

>rpr\_C>grim

ATTTGGTTTCCATATTTTCATCCTGGTGGAGAGAAAATCTTTGGGATTTTCTCGAGCCACAACAC  
CCACCCAATTTTAGTTTTTATCACAATCGCTTTGATGAGTAATAACTCATCAAAGCGATTGTGA  
TAAATGGTTTTGTTTCTACAAAAAAGCGGCCGCATGAGGAGGAACGAGTTTTGTAAAACATGGGA  
TATTTCCACAACAAAATAAGAAAATAATTTTTAACTATTTTTGAGAGAGAGAAAATTCAAAAT  
TTGT

>rpr\_Δ5>grim

ATTTGGTTTCCATATTTTCATCCTGGTGGAGAGAAAATCTTTGGGATTTTCTCGAGCCACAACAC  
CCACCCAATTTTAGTTTTACTCATCAAAGCGATGGTTTTGTTTCTACAAAAAAGCGGCCGCATGA  
GGAGGAACGAGTTTTGTAAAACATGGGATATTTCCACAACAAAATAAGAAAATAATTTTTAAAC  
T

>rpr\_N>hid

AATGAAAAATTATTTTTGTAAATTTGTTTGCATCAAGTGAGCAAGGGGATTAGATTAAGGAATCA  
TCCTCGAGCCACAACACCCACCCAATTTTAGTTTTACTCATCAAAGCGATTGTGATAATGGTTTT  
GTTTCTACAAAAAAGCGGCCGCGCCCAAAGTCGTACAGATTTTTGGTTTGCCATAAATACT  
CGAACAAAAGTTAATGAAAACGAAGCAA

>rpr\_C>hid

AATGAAAAATTATTTTTGTAAATTTGTTTGCATCAAGTGAGCAAGGGGATTAGATTAAGGAATCA  
TCCTCGAGCCACAACACCCACCCAATTTTAGTTTTTATCACAATCGCTTTGATGAGTAATAACT  
CATCAAAGCGATTGTGATAATGGTTTTGTTTCTACAAAAAAGCGGCCGCGCCCAAAGTCGT  
ACAGATTTTTGGTTTGCCATAAATACTCGAACAAAAGTTAATGAAAACGAAGCAA

>rpr\_Δ5>hid

AATGAAAAATTATTTTTGTAAATTTGTTTGCATCAAGTGAGCAAGGGGATTAGATTAAGGAATCA  
TCCTCGAGCCACAACACCCACCCAATTTTAGTTTTACTCATCAAAGCGATGGTTTTGTTTCTACA  
AAAAGCGGCCGCGCCCAAAGTCGTACAGATTTTTGGTTTGCCATAAATACTCGAACAAA  
AGTTAATGAAAACGAAGCAA

>gli\_N

CCTCAGACATCCGTATAAGTAACAGCTCTCTAAGCGCAGGATGCGCTTAGGGAGTCAGCCGAAT  
CGTCCAATTACAGAGCCAATCAACAATCCAGGAGGAAGTATGCCAGTTTCTCCTGGAATTTTTC  
TTTAAAGTAAGTTAGTTATTTTCGAAAAAAGTAGTTTATGTTTGTATTTATGATAGTTTGT  
AACAGATCTTTGAG

>nrx\_N

TTATGTTTTTTTTTTTAGTCTTTGGTTCTGTCTGACGGCATTATTGAAAATTTCTTCTATCACAG  
AATACCGTCCATTTTTAGTTAATTTTATGAACTTTTGTTTGCAAAATGAGTTAAAACTTAT  
TTAAGGGAGCTGCCCGAGTAGCTCAACAAAAGCCACCTATTTTATGTATTTCTA

>ttk\_N

CTCTGAACTGTAGAATACATCATAGCAACATAAGCAATCGTGGCACTCAAACGCAACACACCAG  
ACTCAAACGATTTTTAGTTAATGTAAACCCGTAAGCAATATTAATTCTAACACTTGCTCCGTC  
CAGAACGCCTTTTTTAAGCAACACTAGTATTTAATTTACCTAGGACATAAGTTTTGCCCAATT

>cont\_N

AATGAATGCAGCACAAATTAAGATCCATAACTTTAGGCAGTAAGAACATACATATACTAAGAAG  
TGACCTTATATTTGAGTAAGTGAAGTTATAAAAAGAACTACATTCCATCCGTGCTCTCTTGCAA  
GCCCCTTAATTGATACAAATGCAATTCGGTCCATTTTTATAGACTTTTATCAAAAAATAATTTCT  
AAAATTTTATCAACAAAATAAATATGAATACCATTATATGGTCCAGTATGTTGCTGAACTAAAA  
TACCAAGGG

>trio\_N

TTCCAAATGATAAGGCAGGAAGCTTAAAGGCAAGCAAGAACAACAAACGAAAGTATGAGAAAAT  
GATATTCAAATGTGTTTTGGGCAAAGGTGTTCCGCCACCGAAGTGAGCATTAGCCTCGCACTTG  
TTTTTCCGTCTGTGCGTTTGTTTACGGATAGTTTTGCTCACTCACACCCAGAAACACTCGCATA  
CTCAATCCTAATTTGTATGTAACCTTGTAAATTTGTAATTTATTTATTCGTCATCAATTGCGTTTCC  
GTTTCAGTCCACC

>CG12789\_N

AGCCATCAGCGACAATAAGCAGGATTGAACAGAACCGCCACATTCAACGCCATTTAGATAGTTAA  
GCCGTCCTAGTGCTTTAGTCGTAGCTCATAGTTTAGTGACACTCTAAAACACCCAACCTGAAAAT  
TG

>CG12880\_N

GTTCTACCAGAACATCATCTCGTAATCCAACGGCATAACCTCGGTATACCCAGGGAATACCCTT  
GAAAGACTGCGGTGCCGGGCGTTCTATTTTCAATATTCTAACGAAGGGGAGCTTCTCCCCTCTT  
CCGTCCAGTTTCCACTTGAATACCCAATCCTGGCGAATCCCGATCACATCTATAGCATCCTGG  
CCAAATGTTTAAACAATTGCGATG

>rn\_N

TTTGTAATTTTTGTAGATCTTCTTGGGTTAAGTTAAGGGTGTTCGTTCTCGCGCACTCGATAAG  
CACTATGTAAATGGCCAACGATACGTACTCTAATTTGACAAAACCCGTCCAATACCTATGTTTAC  
ACAATGTCTTGAATACAAGCACCAGTTCAGGTCCAGATA

>sinu\_N

CCTTAATTAAGTGACCCAGAGAAAGGTAAGCGAAACTCCGCCATTAGTTTTAAGAACAACA  
TTCCCTTTTGAACCTCGAATATTCCGCACAAGTTACCTTCTTTTAAAGGTAACAATTAAGTCTGT  
ATTAATCATCCGTCCCTTTGCACGTATTTGTAACATTTTCTAAACCGAGAATTTAGCAATGTATT  
AAAGCAATACATACGTCTTTTACCGTCCCATATAC

>mega\_N

GTCCGCCCAGACTTCCATACATTCCGTTCCGATTGGATCTTAGCTTAAGTTTTTCAGACGCAATCT  
CGTGCCTCGAATCTGCGCAATCGACGCCGTCCAATAGTGCCTTTAACAATCGACCATATGTATCT  
ATATACACGCCGACTCAGCCGAGATCAGCTCGTATCCGTTTGTAAATTGTATTA

>gli\_N>rpr

CCAAACACAGTCACCACTCATCAGCCGACGGCACTCGATTTCTACTGCAGTCAAGGACCTCGAG  
GCGCAGGA **TGCGCTTAGGGAGTCAGCCGAATCGTCC** AATTACGCGGCCGCAAAATTTGAAAAA  
TAACGTTTTTATAAAGTCCCAATTTTTTACAAAAATGTTTCAATGA

>nrx\_N>rpr

CCAAACACAGTCACCACTCATCAGCCGACGGCACTCGATTTCTACTGCAGTCAAGGACCTCGAG  
TATTGAAA **TTTCTTCTATCACAGAATACCGTCC** ATTTTTAGCGGCCGCAAAATTTGAAAAAATA  
ACGTTTTTATAAAGTCCCAATTTTTTACAAAAATGTTTCAATGA

>cora\_N>rpr

CCAAACACAGTCACCACTCATCAGCCGACGGCACTCGATTTCTACTGCAGTCAAGGACCTCGAG  
AAAT **TCCCAATTATCCGTTACCGCAACCGTCTA** CGAGAAAATGCGGCCGCAAAATTTGAAAAA  
TAACGTTTTTATAAAGTCCCAATTTTTTACAAAAATGTTTCAATGA

>ttk\_N>rpr

CCAAACACAGTCACCACTCATCAGCCGACGGCACTCGATTTCTACTGCAGTCAAGGACCTCGAG  
AATGTAA **ACCCGTAAGCAATATTAATTCTAACACTTGCTCCGTC** CAGGCGGCCGCAAAATTTGA  
AAAAATAACGTTTTTATAAAGTCCCAATTTTTTACAAAAATGTTTCAATGA

>cont\_N>rpr

CCAAACACAGTCACCACTCATCAGCCGACGGCACTCGATTTCTACTGCAGTCAAGGACCTCGAG  
CAAG **CCCCTTAATTGATACAAATGCAATTCCGTCC** ATTTTTAGCGGCCGCAAAATTTGAAAAAAT  
AACGTTTTTATAAAGTCCCAATTTTTTACAAAAATGTTTCAATGA

>trio\_N>rpr

CCAAACACAGTCACCACTCATCAGCCGACGGCACTCGATTTCTACTGCAGTCAAGGACCTCGAG  
CATTAGCCT **CGCACTTGTTTTTCCGTCT** GTGCGTTTTGTTTGCAGGCCGCAAAATTTGAAAAAATA  
ACGTTTTTATAAAGTCCCAATTTTTTACAAAAATGTTTCAATGA

>CG12789\_N>rpr

CCAAACACAGTCACCACTCATCAGCCGACGGCACTCGATTTCTACTGCAGTCAAGGACCTCGAG  
CCGCCACATTCA **CGCCATTTAGATAGTTAAGCCGTCC** TAGTGCTTTAGTCGCGGCCGCAAAAT  
TGAAAAAATAACGTTTTTATAAAGTCCCAATTTTTTACAAAAATGTTTCAATGA

>vvl\_N>rpr

CCAAACACAGTCACCACTCATCAGCCGACGGCACTCGATTTCTACTGCAGTCAAGGACCTCGAG  
ATCCAGG **AGTCGAACTCAGCTGCAGCTGCGTCC** ACTCCTGCGGCCGCAAAATTTGAAAAAATAA  
CGTTTTTATAAAGTCCCAATTTTTTACAAAAATGTTTCAATGA

>CG12880\_N>rpr

CCAAACACAGTCACCACTCATCAGCCGACGGCACTCGATTTCTACTGCAGTCAAGGACCTCGAG  
TCAATATTCTAACGAAGGGGAGCTTCT **CCCCCTTTCCGTCC** AGTTTCCACGCGGCCGCAAAAT  
TGAAAAAATAACGTTTTTATAAAGTCCCAATTTTTTACAAAAATGTTTCAATGA

>sinu\_N>rpr

CCAAACACAGTCACCACTCATCAGCCGACGGCACTCGATTTCTACTGCAGTCAAGGACCTCGAG  
GTAACAATTAG **GGTCTGTATTAATCATCCGTCC** TTTGCGGCCGCAAAATTTGAAAAAATAACGTT  
TTTTATAAAGTCCCAATTTTTTACAAAAATGTTTCAATGA

>mega\_N>rpr

CCAAACACAGTCACCACTCATCAGCCGACGGCACTCGATTTCTACTGCAGTCAAGGACCTCGAG  
ATCTCGTGCCTCGAA**TCTGCGCAATCGACGCCGTCCA**TAGTGCGGCCGAAAATTTGAAAAAAT  
AACGTTTTTATAAAGTCCCAATTTTTTACAAAAATGTTTCAATGA

>rn\_N>rpr

CCAAACACAGTCACCACTCATCAGCCGACGGCACTCGATTTCTACTGCAGTCAAGGACCTCGAG  
CACTATGTAAAT**GGCCAACGATACGTACTCTAATTTGACAAACACCGTCCA**TACCTATGCGGCC  
GAAAATTTGAAAAAATAACGTTTTTATAAAGTCCCAATTTTTTACAAAAATGTTTCAATGA

>gli\_UTR

CCTCAGACATCCGTATAAGTAACAGCTCTCTAAGCGCAGGA**TGCGCTTAGGGAGTCAGCCGAAT**  
**CGTCC**AAATTACAGAGCCAATCAACAATCCAGGAGGAAGTATGCCAGTTTCTCCTGGAATTTTTTC  
TTTAAAGTAAGTTAGTTATTTTCGAAAAAGTAGTTTATGTTTTGTATTTATGATAGTTTTGTA  
AACAGATCTTTGAGATCTCAGTTTTGAGTTGTAGTTTAGGCAAACCTGTATTTCTAATGCCTTA  
CTTTAAGTTAAATTTGTTGTAAGTTTGTATAACCAACGAATACAAATCCATATCAATGACATTC  
CATAGCCTTATCATCGGCCTTTACGTGTATATATAGAATTTAAATGTATAATAAGAATTTATTTA  
AATCTAGGAAATTGCCTGCCTTAACTGAAGGAAATTAGCTATATAATAACAAGTATTTTTATAAC  
AAATGCTGAGCTTAAATTTTTAAAACCTACTTTTAGTGCCAGTAATATCGAATGAAATTGTAAA  
GAGAGTATATCTTTTAAATCAAATATTTAAAATACAAAAATAAATTAACCTTATAAAAAATAATG  
CATTACATTATTTAAGACCTGCTATTATTTGATAACAACTCATAACATTGTCACGTCCCGTAT  
TATAAGAATATCATTAGAATACCATTAGATCGTAGCCACTCCACACATCATCAAGAGCAATAC  
ACCTACAGTGCCTTAAATAATATTTGGTAATTGTCCTCGATGGACCCACCCACCCCATCCATGAT  
GTACCAACTAAGTGTGCCTTTCATACATACATAAATGTACTCCTAGTTATATACTATATATGTT  
CTATATGTTCTGTGTGTCGCATATAAGCAAAATGACCATACAAAATCAGTGTGAACCGTCCAAT  
AACTTATGTTTTCAAAGTGTACATTGTTTTTCTGTATATATCATCATTTGTTACACGATTGA  
AAGCATATTGTTTTTACCACATTATATGTTTATATGTACTTTAGATAAGTTTTATGTATTTGTC  
CATAA

>CG7161\_UTR

TGATGGAAGACTTTTGAAATCGACATAAGAAGTGT**GTGCAAATATATAATTTCCGTCC**AAAACT  
GTACAAATAGGAACTATACGCAAATAAATACGGTGTACGCCAGGTTTCTCCTCCCTTCA

>trio\_UTR

ACCAAAAACAAATGAACGCCGTTGGCGAAAGAATTCCAAATGATAAGGCAGGAAGCTTAAAGGC  
AAGCAAGAACAACAACGAAAGTATGAGAAAATGATATTTCAAATGTGTTTTGGGCAAAGGTGTT  
CCGCCACCGAAGTGAGCATTAGCCT**CGCACTTGTTTTCCGTCT**GTGCGTTTGTTTACGGATAG  
TTTTGCTCACTCACACCCAGAAACACTCGCATACTCAATCCTAATTTGTATGTAACCTTGTAAAT  
GTAATTTATTTATTCGTCATCAATTGCGTTTTCCGTTCCAGTCCACCTTTAGATTTTAGTTGGGCC  
GCCTTTCTGTTTCGTATAGTTTTTGTCTTCTATTCGGGATTTGTGTGTATGAAACGCAAAGTATT  
ATATGCTCAAGATTACCTTTGACATTGTGTGCATTTTTAACTTATTTAGACTCCTTTGCTCTTA  
GTTTTACTTTTCCGAGTCTGATTTACTAACGATCCGCAGCCGAGAACTACTCAGAATCAAAGC  
AATTTACATTTTCGTTTTTCGTTTCGTACTCGTTTTATTTCGCATTGAACGCAGAGTAAGAGTAT  
AACTATTCTAGCCTTAGTTTGGTACATAGTTTTAGTTAAACTGCTAAATGTTAATCATAGTTTA  
TACTTGAGTTACTGGATTTGCTTTGCAAAACTAAAGCAGAGATTTGTGTAATGGCACTCGTTTCG  
AGTGTGACAACCTTCGTGAAATAATTTAAGCTTAACTTTAGTTTATGAATGCAATGCAAAGCTTA  
TTTTGACTTTTATAATTTACAAATAAAATATGTAAGCTTTAAACGTAATCAAACCAGAAACAAT  
AAGTTTTTAATTTCTAATTTTAAACTATGCCGAAATAAACATAATGCCTGCTCGGATGTAA  
TTATTATTTTTTGGTTTTTCGTATTCTTTGCCCATTTTCGGTTGTTTTGTTTACAAAAAAGTCC

ACAACACTTATAGGCTAAGCAGTCAAGTTTGAAGCCCGAACCCAGATGATAGCACTTAAGCC  
AATCTAAACTGTATCCGAGACGATTTTCGAAGCATATTTCTCGTTTTGGTGTCTGTGCGTTTTAT  
GTTAGTTGGTAAGCAGGAGCCAGTTGGGCCAATGTACAGTGTAGCATAACGAGGATAAGTCAGAG  
TCACTCAAATGCATGTGTCTCTTGCAAACAAATTAAGTCAAACAGGACCAGGATTTGATTAAACG  
ATTATATGTATAGAACACGAGACGAAGTTACTAAGCGGTTGTCCATCCAATGCTTTCAATCCGA  
TTTTGTCTCTTAGAAGCACCCACACACACACACCCGAGACGCCGGTTACAGTCTGGAGCATGAAT  
ATAAATGCCAGATGCATATATCAATGCGAGGAAAACAATAATGATTTAGCAAAGCTAAATGTAG  
GAAGCAAACATGAAATGTATTTTTTTTACAACATTTGTGAAACGAACCTCCGGCATTATTCGTAA  
TTAAATGTTAAAGTCGCGACGACGGATCGGATCGGATGGTAGGATCGTAGGTCGAAGGATCGAA  
GGATCGATGGATCAAATGATCCGATGATCAGATGACAAGCAAACGCACAGTGAGGGGAACCCAA  
TAGCCACAACATTTTCTACATTTTTCACATTTTACTCGTGGAGGGAGCTCTACTCAACTCACAAC  
CGATCGACCGTAACATGTAACATACTAAATTCTTTTCGATTGTATTAATGGCACTTACCGATTA  
ACTAATTGTTGTACTTAAGCCCTGTGCAAATTTCTAGATAATTGTGGTAATTAAAGTGTGTGTTT  
TAGTTTTATCTAATTACTCTGACTAACTATAAATATATTAATTACAACGACATCATGTGCGT  
CAGTGCAATGCGAACAGCATAAAGTAAACGTGTTAATCTGTGTTTTAGTCAAGTAAGCATCAGC  
TTTCCCTCGGAAAATGCCCGGAAAAGCCTGGCGAGATAAACTTTTGGCCCGGGCGCAGGCTGCA  
AATAAATATAATTATATCCAGAAACCACTATGCAAATTGTATGTAACCAACAAAGCATGTAATC  
TGAATTTAAATTTTTCAAAGTGAATAATAACAAAGCAAAGTAGCTGAATAAACTTAACATACT  
CAA

>CG12789\_UTR

AGCCATCAGCGACAATAAGCAGGATTGAACAGAACCGCCACATTCA**CGCCATTTAGATAGTTAA**  
**GCCGTCC**TAGTGCTTTAGTTCGTAGCTCATAGTTTAGTGACACTCTAAAACACCCAAGTAAAAT  
TGCAAGCATTCCCGTGCCATGCCAAAGATTAGATAGCCTTCGAAGTCGAAACGTCTGGTGGAC  
TTCGCTTAGCTAACGAATACTCTTTTTTACATTCCTTAGTTATTAGATATGTTTTGTATTA  
GATTTCTTGACCCATGGCTTTCGTGTCAAATAAAATCTTCAACTAA

>activin-beta\_UTR

TGATGAGTGTGGTT**GCCCTTAGCCTTGCCTTACAATTTTATATTTTCCGTCC**GATAGAAATAAA  
AATATATGTGTCCTAACTGAGCGCCAATCTCTTAACGAAATCTTTTACTTTTAAGTTAAAAGTA  
CATAAATATATACATAAAGTAGACTCAATTTTTATTTTATACTTAGCTATGCTGGTGACAATATT  
TGATATTTTACGAACAAATCCAAATTGAGGAAGTGCCTAAATTACGTTAATGAAATATTTGTAC  
ATTTTAAGAATATTTCAAAAATCACTAAAATATCTTTGTACTAATAAAATTCGATATTTTAAAT  
TATTACTTTATTTAATATGTTCAAATTAACATAAGTATAAAACGAAATGATTTAATAACCTATA  
ACATGAGCAAAGCGTCGCGCTTTTTTTTATTGTCAAACATTAATTTTACTAACTTGAAAAGCTT  
ATATCACAGACATGTAATAAATATTTTCATATTACAGTTTAATAAAGTATTAATA

>vv1\_UTR

GGCGGCCCACTAGCAATCAGAAATCCAGG**AGTCGAACTCAGCTGCAGCTGCGTCC**ACTCCTGCA  
TCCCTCAATAATCTAAGCCAGCAGCAACAGCAGCAGCAACAGCAGCAGCAACACCAGC  
AACAGCAGCAACATCAGCAGCAGCAGCACACACCGAATACACCATCCTCCAGTGCGGGATCATC  
GGCTACGATGACCAGCCAGGTGATGTGCGCCGAGAGTCCGCTGGGCAGCTCCTCCGCTGGCAAT  
CAGGCTAACAACAATAATAATAATAACAACAACAATAGCAGCACCAACAATAACAATAATA  
ACAATAACAACGAGGAGCAAGTTAAACACCACCAGCAGCAACAGCAACAACAGCAGGCATCCAG  
CATAGCAGCCGCTGCAGCAGCCGCCATGTACGTGGATCCCATGCGCTACCAGCATCCGCACCAC  
CCGCATCCGCATCCGCACCAGCATCCGCACCTGAATCCCGCCACCATCCGCACCTGTTCCACA  
CGAGCGATCAGTTGCAGCACTCGCAGCAGCAGACCGTCCGGCGGCACAGCAGCAACTCCCAATTG  
TCACCGGGTGCCGGCAGCAACAGTGGCCTGCCACTCCAGCCGCCAGTTCGCTCGCCGGCCG  
GATCCGCATCCTCGGTGCTTGGTGGCCATCTCAATCTGAATCCGCTGCACCAGCACCACCTA

TCAGCACCACCATCACCAGCAGCACCACCACCACCAGCAGCAGCAGCAGCAGCTCCACGCCCGC  
CGACTCTTCGAGTTGAGTCTGCAGTTTGGAGCGGCGGGCACCAGGAGCGGTACGGCACTTTA  
ACAGCTTTGGCGGGGCGGGCGGAGCGGGTGGCGAATAGCATTTCGTCCGCCCTGGTTCGGCTA  
TGAGTCTCCTAGGATTCGGCGTCGAATGGGTGGCCGCATTTCAAGCGGGAGCAGCCTAGAAT  
CGTACAGTCGAACTTCTCTAACGCGAACTCAGTTGGTTCGATTCGAATGATCGCAAAAGTAGCT  
ATCTAAAATTTAACTAGCTGTGAGCATTTTCAGAATATTTTCGTAAGTCATAAGAATATTTTTGAA  
ATTTTTCAATATTTTATTTCTGCGGTGTTTTGAGGTTTTTTAAAATTTGAAAATAGCATTTTAC  
AGTGTTCCTAAAATCTGTTACTAAATTTGGCGACTGAAAAAATCATTTTAAACATATATACTTA  
ACAATATGAACCATATTGAGTTCACGTTAGACAAGCTCGACTGTATGCAAATCTTTAAAGAA  
TAGAAATAAGATGAGGTCCGTTCGATGAGGTTGAGAAATCATCTTTTTTACCAGTGCATTAATCT  
GTGTTAACTTCAGCTTAAATAGGAGCAGGGAGTGGAGGAGGTGGAGAAGATGGGGAGGCTGCC  
ATCCACCATTTTAGTTTTGTTA

>chp\_UTR

TGACTTCTGCACCTTACATATAAGACGTCCACCGACTTTTATACCATTCTTGAGCAAGTCTACG  
GCAGACA **GGTCATATGAGTCCTGCCGTCT** TAGAGTTTAAAGCGTGATGATGAGACTTTGGCCACTT  
TGATACCTTTTTGCAGTTAGTTGATTCTCTTCCGACAACCTTCTCTCACCGATCCGCTGGTCTT  
GGTAACGCCTTATATGTAGTACTCCTCACAATTCACCACCGAAGCACTCCATTCTTCGCCTCGC  
CTCACTGTCTATCTCCATGTATGTATATTTCTCGTAGGCCTTAACTAATCCAGCTAATCCAGCTA  
TCTAGTAAACCGCCTGACCTGACCCACGAATACTTTCTGTACTTCTTCTATAAGTTAGTCACT  
GCGCTGCTTAAACAATTCAAAATGAAAGTCTGTAAAATGTTTCATAAACA

>CG12880\_UTR

GTTCTACCAGAACATCATCTCGTAATCCAACGGCATAACCCTCGGTATACCCAGGGAATACCCCTT  
GAAAGACTGCGGTGCCGGGCGTCTATTTTCAATATTCTAACGAAGGGGAGCTTCT **CCCCTCTT**  
**CCGTCC** AGTTTCCACTTGAATACCCAATCCTGGCGAATCCCGATCACATCTATAGCATCCTGG  
CCAAATGTTTAAACAATTGCGATGGGTGCGTTCTATTTTTTATATAACGGCAATGAATACAATAAC  
AGGTGGGCTGGTCCAGGTGGGGTGCATCTCATATCCATCCATGTGGTCAGCCATATCAGCACAA  
AGAACAAAGTGTCAAAGTGACATGACTTCATTCGAGATTTCAATGTAAAAACAAAGAGTTTAA  
GTTTCAGAAAGGGTTTTTGATTTGAGCACAACTGAGTTGAACTAATCGGATTATATATTTAAT  
TGAAATTTAATATCTAAAGTTTAAATCAGCTTAGCAGCAGAGTGTGAAATATTCGAGTGGCACTT  
CTTCATACACATATCGTTTTGATCGGAAATCCCAAAATCCTTTTCTTATGAAGGACACCCCATC  
CGAAGGACCAGTCCAAACTGCATTTAGCTAAGCAACTGCGGCAAGCAATAAATTTATGGCATAAT  
CAAGCTAGGTTTTAAGTGCATGAACGACTTTGTTTTGATAAATAAAAAATA

>CG6583\_UTR

CAGAATATTTAGAAAGTTAATAGGAAAACCAGGCTTATCCTCACCACAAACGAAACACGCAATAA  
GTGCCTTTTCGCCACTCCACATGATATCTAAGCTAGGATTGACTTTTG **ATATCAAAAACACATT**  
**CCGTCC** ACCTTTTTTCTGCCTATAATTAAGTCGAAAAGTTGAAAACATTTTAAATCGTATAGGTA  
CATTAGTTATCTACAATATCCAAACAAGAGGCAGGTAATTTACAGACCAAAACTAGCTAAAAT  
ATTTAAATGAAAAGTAAACGTTAAACAATTTGTAATTTTCTTATGTTCGCTTGTACTTTTTTATATAG  
TTAACTTAATGAACATGTTTTCAAATGATTTTACTACATTTGATTTTTTAAAAAATGACCATTC  
CGAAAATGCTTACGTTTGACATATTTATTACTAGTATTTACCTGCCATATCCGAATAACCACTA  
CCATATCGAAAACAGTAAATTTGTACACACAGAATATGAAAATATATACTATATTAAGAGTAT  
TAAACAATTCATTTTTCATTTA

>nrx\_UTR

GGTCGCAAGAATATGCACATAAATCGTTTTTAAATCGCCTTAGGCACGCAACAGCGACCACTCA  
GACACACCAAAAGATAAAAAAAAAAATAGATGAGAACGAAGTGAATCAAATAGACACGGAAAA

GGCTCACCACGCATAACAGACAGAAAATACTTTTCCATGCACTGCCAATTGTTTTGCGCAAGTA  
AATGCTAAGATTTGATTTATAATTGGTTGGCTACATTTTGCACTTATGTTTTTTTTTTAGTCT  
TTGGTTCTGTCTGACGGCATTATTGAAA **TTTCTTCTATCACAGAATACCGTCC**ATTTTTAGTTA  
ATTTTTATGAACTTTTTGTTTGCAAATGAGTTAAAACTTATTTAAGGGAGCTGCCCGAGTAG  
CTCAACAAAAGCCACCTATTTTTATGTATTTCTATTGCGCGAGTATGTAAGAACGAACATTCAT  
TATTTTTAATATGTTTTCTCGCTTTACGTTTAAATTTAAAAATGTCTTCTACTTTACACACAAA  
GAACATGAAAATCATTTTGTGGCTAAACAAAATCGGCTACTTTAGTAACACAAAGCATTA AAAA  
CAAATTGTATTTTTGGAAAATGCATTTTGAACGTCTTGACTTGAAATTTTCAAATATACATTAG  
CATGTGTATATAGATATATATAGCAATAAAAAAATATATATAATTACAAAAAGAGACAATGAA  
AAAATTA AAAATTTTTATCTTTCAATAAAAAGAGAACTACAAATAAATGAAATTGGA

>rn\_UTR

GTCCTGGGAAGGACAAGGGATAGCTAGGGGCTACTTCTAGATGGAAGGTAGTTCATCCGTTGT  
TTCTCCAAGCGGAGACGAGGCGTGCATTCCTGTACAGTATTAATTTGTAGTTAGTCGTAGCGAG  
TAAAGGTCATTTTGTAATTTTTGTAGATCTTCTTGGGTTAAGTTAAGGGTGTTCGTTCTCGCGC  
ACTCGATAAGCACTATGTAAT **GGCCAACGATACGTACTCTAATTTGACAAACACCGTCCA**TAC  
CTATGTTTACACAATGTCTTGGAAATACAAGCACCAGTTCAGGTCCAGATAA

>sinu\_UTR

TCGTTTTATATTTTTATTCAATGGTTTTCCCTGTGCATAGGTTAAAGTATTCATGTCGGTAACATT  
CGTTTTTATATTACCTTAAATCGTTTTAAATAACTCCCCAACTGGCGGAGATTCGAAAAATTTTA  
ACGAACCAAAGTTATTTTGGATAAAAAATAATTTTCGCCATATATTCATCGCTTCTCTCTAACAT  
ACCTAAAGAAATTAATTTTTAGTTCAGAGAAGTTCGACTGTACTCGTAGTTTTTTAATTTAAAAAG  
TTTTATGCAATTGACGGCCGCACCGATTCACAAGCTTTCAGTTTTTGGTACTTATAATCATCCAT  
CCAATCGACCAGATCAGTTCCAAGAGAAGACTGAATGTTTTTCCGAATGAAAACCAGAACCAAG  
CACAGCTAACATCAAACGAAGACGCTCAACTAGATGACTCATGTTTCATGTAGAGTATTCTACAG  
TATTTGCATATCAATTTTCGCTCAATTAACGCCCAGACACAAAGAGCATAACCCCTCCGCAATTG  
TACGTTTTATTTTTTTCTTTAGCAAAGTCGCAGGCTAGTCGGAAC TAGCATCGAAATATTACAC  
TCGTGCCTTAATTAGATAGA ACTATTATGGTGTAGTTCGTAGTGCCTGAAAACAAAT TATTGTT  
ATAACATACCTGAACGACTGACCTGCGACTAACCATAGAGATCATTGAATTGCATAAACTTCA  
GCTAAGCTAGTGCCTTAATTAAGTGACCCAGAGAAAGGTAAGCGAAACTCCGCCCATTAGTTTT  
AAGAACAAAACATTCCTTTTTGAACTCGAATATTCGCGACAAGTTACCTTCTTTTAAAGGTAAC  
AATTA **GGTCTGTATTAATCATCCGTCC**TTTGCACGTATTTGTAACATTTTCTAAACCGAGAATT  
TAGCAATGTATTAAGCAATACATACGTCTTTTACCGTCCCATATACAATAATATGTGTAACAT  
TTTTATGTACAAACGACTTTTAGCTAAAGCGAAGAATAATAAAGTTA

>CG1298\_UTR

CCGCTGTACAAGGAGGAATTCAAACAGATATATAAATCAAAAATGA **ATTTCGAAGGAATTATCCG  
TCC**ATTTACACAATATTTAATAATAATTAACAAATATACAAATATATACGATGTAAGGTAGAAT  
AGTCATTCCACTAAATCCACTACAAATGTTTTTAAA

>mega\_UTR

GTCCGCCCGACTTCCATACATTCCGTTCCGATTGGATCTTAGCTTAAGTTTTTCAGACGCAATCT  
CG **FGCCTCGAATCTGCGCAATCGACGCCGTCC**ATAGTGCCTTTAACAATCGACCATATGTATCT  
ATATACACGCCGACTCAGCCGAGATCAGCTCGTATCCGTTTGTAAATTGTATTAATAGCACGTA  
CAGCTAAACGTAAGATCAGTGCGACCAAAAAGATCCACTAACTTTTTACACATCTACCATTATA  
CTTTTTATATAGGCTCAAAAATGTTTACAGCTTAAATTTTTAGACCATATTCCACCTTTTATAA  
GCAAACCTGGTGTAGAGACATATCAACATTTGAATTAATGTATTATTTGAAA

>cora\_UTR

AGAAGATTGAAATTCAGCAGCAAACGCAGTAGATTTTATAATTATTTTTAAACCATTTCGGATGA  
TTTTCTAAGTAAACCCGCACACACACTCACACACATGAACACCAGCCCACGCATACGCAGCACT  
TGCAGTACACCTTTTATAACAACCTATATCTAAATATAATTTAAACAAATATATATATATATACA  
CACGAGTGTATATTTGAGCTCGAGCTGATGACCCACATGACATAACACTAAGAAACATAAAAAG  
ATAAAT**TCCCAATTATCCGTTACCGCAACCGTCTA**CGAGAAAATGCATCTACATGTTTATTATT  
TTTATTACAACCTGTTGTTTATAATTACTTTTTATTACGTATATTATATATTGAATGTGCAAGGC  
AACGTTGAAATGAAAACCTCTATATATTGTAAACCACGATTGCATTCAAATACAAGAATAAAACC  
TAAATGTACACACACAGAAAAA

>lac\_UTR

CGGCGTTGCTCTTCGCCAGATAAGCCAATGGGCCACGGCCGTCGACTCCAAGCGCTTCAGGTC  
CAATCCATCAACCAGCCCTCGAATGCATAAAACATATATAAAATAGATATATCGAAAACAAACA  
TCGTGTAACCGCGCAATAGATGTCTCAAACGATTTTCGGACACACCAACCCACATCCAGTTCTCA  
GTTTCGTTTTGTAGCTTCTGCTTCCGTTTCCGTATAGTCCAGCCCAATTTTTGTACGTCCAATAT  
TATGTCTTAAGTTAAGTATGATAAGTGAAGGGCCAACGATAACTAGACTATAATTTATTAGCAC  
CCTAGAGCCGAACCTCAAACCGAAATTAGACTCCAGCCCAGCCGTAAACGATGCATTTCA**CCTTG**  
**ATCCCGTCC**GTTTTGCTTTCTGATCTGGCACTGTATATGTTTTAAATATTTTAATCTAAGCAAG  
ATACATCACAAGCATTCCGATTTTGCTTCGACAATTGAGAGGATATTTTATTTTTATTTAATAA  
TAATAAAGTATTTTCGTTACGCAAACCTATCAGCTCGACACACTATTCCCTAAATAATATCTCA  
ACCCCATAAATCGAGGCAAAATCCATATTCGAATAAAAGGCAACAAAAGTTGTGTACATTATTA  
GCTCATAAGCACAAATGAGAAATCTTTTTGAATAACAAGACATTTTTTACCCAAATTTTTGTGTGG  
GTGTGAGTAAATCAATTTGACTTTGTAAACAAAAAAAAAAAAAGACAAACGAAAAACTAAAAT  
TAACA

>ttk\_UTR

TGAAGGACCAGAGTTACGGAAGGACTACGAACGCACAACAACGTTTACCTTAAGCAGCGAGCTC  
TGAAGTGTAGAATACATCATAGCAACATAAGCAATCGTGGCACTCAAACGCAACACACCAGACT  
CAAAACGATTTTTAGTTAATGTAA**ACCCGTAAGCAATATTAATTCTAACACTTGCTCCGTC**AG  
AACGCCTTTTTTAAGCAACACTAGTATTTAATTTACCTAGGACATAAGTTTTGCCCAATTGAGC  
AACGCAATTGAGCAGTTCAGTGAACCTTAAATGACTTTTCGGCTTTAATTATAAACAATTCGACTG  
GCCGCTTACTGGATCCGCACACGATCCGTAAGGCAAGCAACTTTAGAACTTTTCATTTCTCTTT  
GTGATTTTGTAAACCTTTTTATATAGACCTTTGTTTTTTATTTTTTTGTTGTACATAGCTATAT  
TTTGTTTAATACTCAAAGTCCGTAGTATAATTTTGTTCATTTCCCTTGGCAACAAGTTGGAATCA  
AATGTATTGGCTAATTGTGCAATCTTCAAACGTTGTTGGTGGCTTCGGAGGAACGCGACAACGC  
TGTTCTGCGGCCCCACGAAATGTTGTAACCTTAATTAACACTAAGGCCACTTAAGTAGGATCT  
AGGTGTAGTCATAAGGCATTGGATCAATGTTCCAGCGTACAACAAAACGGACTTCCAGTGAAGA  
GACAACCTGATATTTATACGGAATCCAATCTGGTATTATGTATTATGATTTTTTACAGTTTACTT  
AACGCAACAAATACGACTTAAGACTTGTGCGCTCAATGACTAGAAATTATAGTTGCGATTTTAG  
GATAACTATTCATGGAAAAACCACAAACGAGTTTTTTAATAAAGA

>cont\_UTR

CTTTACACAAGCCAATGAATGCAGCACAAATTAAGATCCATAACTTTAGGCAGTAAGAACATAC  
ATATACTAAGAAGTGACCTTATATTTGAGTAAGTGAAGTTATAAAAAGAACTACATTCCATCCG  
TGCTCTCTTGCAAG**CCCCTTAATTGATACAAATGCAATTCCGTC**ATTTTATAGACTTTTATCA  
AAAAATAATTTCTAAATTTTATCAACAAATAAATATGAATACCATTATATGGTCCAGTATGT  
TGCTGAACTAAAATA

>nrv2\_UTR



GAGCTCCTCATTGATTAAATTGTACCACACTATTACAACATAACATAATAGCAAACACAATAAC  
AAGAATCTCCGATTAACAAGAATCTCGGTATCAGAGGTGTGTGAGGACGATAAGTCTCGTCTAA  
GACAATCCTACCAGAGGCAAACCACCAGATGTTGTAGTGAAGATTGTGAAAGGTTTCAGATTTTC  
GAATGTCATTAAAAATCCAAATTATTTAAACTTGTTTTCCGCGTTATAAAGCATAACAAAATATA  
TATTCAAGACTTGCAACGCCTATAAACATACAAATTTTGAATTCCAATAACTTTTTATGCACTT  
TACGATGAAAGTTAGACGTAAGATTGTAAAGCTAAACCACCAAGATGGGAACTCAATGGACAGG  
ATGGAACTAAACCAGCCTGAATCTCGTTTTGGCGCTGACCAGTAAATTTGGCGCTGACCAGTAAA  
TAGTAAATCAATCAAATGCAACAAATTTACAGCAATTAATCCAAACTGCCATTTCCAATGAATT  
AACAAACGAATCCCTAGATATTACAAATTTATAAAGAAAATTTAAGAATCATTTTTGAGTCTGC  
CGCTATGTAACATGTAACCGAAAACAGACCAATTTTGTCTACCAAAAATCTAAATATTTACAGC  
TAGCTTCAGAATTTACCATATTTATTAATAACTTAGTCAAAAGTGAAGCCTATATACATATACA  
TCACATTTTGATAGACGACAAAAGTGCAACATTTGGAAAACAGAAAATCGTAACTTCGGTTAAC  
TTGTAAGCTTATGATATAATAATTGCGAAGATTGAAATTTAAGGAAATAAATTGAGACGGCTAA  
GAGACACAAAACACTTTCAATTCCTTTTCAATAAAAATCAAATGAAAGTAGTCA
